# Supplementary material for: Phenoxytriamine complexes of yttrium: synthesis, structure and use in the polymerization of lactide and ε-caprolactone
Source: Royal Society of Chemistry journal article supplement (doi:10.1039/b600939e), 2006-01-01

## Experimental data for the X-ray diffraction study of 2

|                                 |                                                                                                          |
|---------------------------------|----------------------------------------------------------------------------------------------------------|
| Empirical Formula               | C <sub>35</sub> H <sub>78</sub> N <sub>5</sub> Si <sub>4</sub> YO                                        |
| Formula Weight                  | 786.28                                                                                                   |
| Crystal Color                   | colorless                                                                                                |
| Habit                           | plates                                                                                                   |
| Crystal Dimensions              | 0.17 X 0.15 X 0.10 mm                                                                                    |
| Crystal System                  | monoclinic                                                                                               |
| Lattice Parameters              | a = 10.023(1) Å<br>b = 18.636(2) Å<br>c = 12.370(1) Å<br>β = 101.087(1)°<br>V = 2267.4(4) Å <sup>3</sup> |
| Space Group                     | P2 <sub>1</sub> (#4)                                                                                     |
| Z value                         | 2                                                                                                        |
| D <sub>calc</sub>               | 1.152 g/cm <sup>3</sup>                                                                                  |
| F <sub>000</sub>                | 852.00                                                                                                   |
| μ(MoKα)                         | 14.24 cm <sup>-1</sup>                                                                                   |
| μ                               | 2.72 mm <sup>-1</sup>                                                                                    |
| Temperature                     | -160 °C                                                                                                  |
| 2θ <sub>max</sub>               | 49.5°                                                                                                    |
| Total reflections               | 10290                                                                                                    |
| Independent reflections         | 6857 (R <sub>int</sub> = 0.035)                                                                          |
| No. Observations (I>3.00σ(I))   | 3958                                                                                                     |
| No. Variables                   | 414                                                                                                      |
| Reflection/Parameter Ratio      | 9.56                                                                                                     |
| Residuals: R; Rw; Rall          | 0.066; 0.059; 0.066                                                                                      |
| Goodness of Fit Indicator       | 1.08                                                                                                     |
| Max Shift/Error in Final Cycle  | 0.00                                                                                                     |
| Maximum peak in Final Diff. Map | 0.71 e <sup>-</sup> /Å <sup>3</sup>                                                                      |
| Minimum peak in Final Diff. Map | -0.72 e <sup>-</sup> /Å <sup>3</sup>                                                                     |
| Absorption                      | Tmax = 1.00; Tmin = 0.14                                                                                 |
| p-factor                        | 0.0300                                                                                                   |
| Detector Position               | 60.00 mm                                                                                                 |
| Exposure Time                   | 20 seconds per frame.                                                                                    |

**Table 1. Atomic coordinates and  $B_{\text{iso}}/B_{\text{eq}}$  for 2**

| atom  | x          | y          | z           | $B_{\text{eq}}$ |
|-------|------------|------------|-------------|-----------------|
| Y(1)  | 0.85564(7) | 0.2196     | -0.02794(5) | 1.17(1)         |
| Si(1) | 0.5391(2)  | 0.1594(1)  | -0.1578(2)  | 1.86(5)         |
| Si(2) | 0.7970(2)  | 0.0718(1)  | -0.1529(2)  | 1.70(5)         |
| Si(3) | 0.7739(2)  | 0.3615(1)  | 0.1432(2)   | 2.00(5)         |
| Si(4) | 0.6772(2)  | 0.3659(1)  | -0.1022(2)  | 1.95(5)         |
| O(1)  | 0.8513(5)  | 0.1606(3)  | 0.1117(4)   | 1.7(1)          |
| N(1)  | 1.1057(5)  | 0.2248(4)  | 0.0805(4)   | 1.4(1)          |
| N(2)  | 1.2704(6)  | 0.3270(3)  | 0.3379(5)   | 1.8(1)          |
| N(3)  | 1.0155(7)  | 0.2513(3)  | -0.1631(5)  | 1.8(1)          |
| N(4)  | 0.7109(6)  | 0.1476(3)  | -0.1355(5)  | 1.4(1)          |
| N(5)  | 0.7655(6)  | 0.3274(3)  | 0.0153(5)   | 1.7(1)          |
| C(1)  | 0.9247(8)  | 0.1285(4)  | 0.1997(6)   | 1.3(2)          |
| C(2)  | 1.0645(8)  | 0.1224(4)  | 0.2072(6)   | 1.4(2)          |
| C(3)  | 1.1454(7)  | 0.0899(4)  | 0.2997(6)   | 1.4(2)          |
| C(4)  | 1.0888(8)  | 0.0640(4)  | 0.3844(6)   | 1.6(2)          |
| C(5)  | 0.9485(8)  | 0.0687(4)  | 0.3752(6)   | 1.7(2)          |
| C(6)  | 0.8623(8)  | 0.1005(4)  | 0.2853(6)   | 1.6(2)          |
| C(7)  | 0.7098(8)  | 0.1055(4)  | 0.2787(6)   | 1.9(2)          |
| C(8)  | 0.6655(9)  | 0.1826(5)  | 0.2806(7)   | 2.8(2)          |
| C(9)  | 0.6663(9)  | 0.0679(6)  | 0.3780(8)   | 3.3(2)          |
| C(10) | 0.6324(9)  | 0.0688(6)  | 0.1727(7)   | 2.6(2)          |
| C(11) | 1.1746(8)  | 0.0291(4)  | 0.4889(6)   | 1.8(2)          |
| C(12) | 1.1370(9)  | -0.0484(5) | 0.4961(7)   | 2.9(2)          |
| C(13) | 1.1467(9)  | 0.0691(5)  | 0.5890(7)   | 2.9(2)          |
| C(14) | 1.3270(9)  | 0.0339(5)  | 0.4876(7)   | 2.8(2)          |
| C(15) | 1.1313(7)  | 0.1466(4)  | 0.1150(6)   | 1.5(2)          |
| C(16) | 1.1170(8)  | 0.2729(4)  | 0.1767(6)   | 1.8(2)          |
| C(17) | 1.2548(8)  | 0.2704(4)  | 0.2568(6)   | 1.6(2)          |
| C(18) | 1.1552(9)  | 0.3352(4)  | 0.3938(6)   | 2.3(2)          |
| C(19) | 1.1182(10) | 0.2716(5)  | 0.4568(7)   | 3.0(2)          |
| C(20) | 1.4010(9)  | 0.3160(5)  | 0.4161(7)   | 2.7(2)          |
| C(21) | 1.437(1)   | 0.3745(5)  | 0.5015(8)   | 4.0(3)          |
| C(22) | 1.1989(8)  | 0.2462(4)  | 0.0069(6)   | 2.0(2)          |
| C(23) | 1.1521(7)  | 0.2233(6)  | -0.1105(5)  | 2.1(2)          |
| C(24) | 1.0138(8)  | 0.3317(4)  | -0.1694(6)  | 2.0(2)          |
| C(25) | 1.1128(9)  | 0.3679(5)  | -0.2308(8)  | 3.1(2)          |
| C(26) | 0.9861(7)  | 0.2195(6)  | -0.2757(5)  | 2.1(2)          |
| C(27) | 0.8522(8)  | 0.2401(5)  | -0.3472(6)  | 2.5(2)          |
| C(28) | 0.7735(9)  | 0.0411(5)  | -0.2972(7)  | 2.7(2)          |
| C(29) | 0.7766(9)  | -0.0055(5) | -0.0643(8)  | 2.8(2)          |
| C(30) | 0.4404(8)  | 0.0781(5)  | -0.1423(7)  | 2.3(2)          |
| C(31) | 0.4681(9)  | 0.1987(4)  | -0.2963(7)  | 2.8(2)          |
| C(32) | 0.4912(9)  | 0.3729(5)  | -0.1135(8)  | 3.0(2)          |
| C(33) | 0.7370(10) | 0.4561(5)  | -0.1359(8)  | 3.5(2)          |
| C(34) | 0.6050(9)  | 0.3746(5)  | 0.1823(7)   | 2.6(2)          |
| C(35) | 0.8698(9)  | 0.4474(5)  | 0.1624(8)   | 3.4(2)          |
| H(1)  | 0.9088     | 0.0490     | 0.4327      | 1.9991          |
| H(2)  | 1.2405     | 0.0858     | 0.3036      | 1.7455          |
| H(3)  | 1.0567     | 0.2337     | -0.3126     | 2.6465          |
| H(4)  | 0.9874     | 0.1687     | -0.2678     | 2.6465          |
| H(5)  | 0.9248     | 0.3457     | -0.2041     | 2.5146          |
| H(6)  | 1.0324     | 0.3493     | -0.0958     | 2.5146          |
| H(7)  | 1.1491     | 0.1725     | -0.1126     | 2.4872          |

|       |        |         |         |        |
|-------|--------|---------|---------|--------|
| H(8)  | 1.2167 | 0.2401  | -0.1518 | 2.4872 |
| H(9)  | 1.2071 | 0.2970  | 0.0089  | 2.3082 |
| H(10) | 1.2852 | 0.2252  | 0.0339  | 2.3082 |
| H(11) | 1.1018 | 0.3208  | 0.1506  | 2.2050 |
| H(12) | 1.0480 | 0.2599  | 0.2163  | 2.2050 |
| H(13) | 1.3251 | 0.2747  | 0.2154  | 1.9858 |
| H(14) | 1.2627 | 0.2255  | 0.2938  | 1.9858 |
| H(15) | 1.0983 | 0.1171  | 0.0529  | 1.8020 |
| H(16) | 1.2264 | 0.1398  | 0.1375  | 1.8020 |
| H(17) | 1.1749 | 0.3740  | 0.4441  | 2.8162 |
| H(18) | 1.0774 | 0.3468  | 0.3392  | 2.8162 |
| H(19) | 1.3953 | 0.2716  | 0.4532  | 3.3263 |
| H(20) | 1.4714 | 0.3131  | 0.3748  | 3.3263 |
| H(21) | 1.5213 | 0.3642  | 0.5477  | 4.8774 |
| H(22) | 1.4417 | 0.4193  | 0.4658  | 4.8774 |
| H(23) | 1.3678 | 0.3772  | 0.5451  | 4.8774 |
| H(24) | 1.0416 | 0.2831  | 0.4883  | 3.6242 |
| H(25) | 1.0971 | 0.2320  | 0.4084  | 3.6242 |
| H(26) | 1.1930 | 0.2597  | 0.5137  | 3.6242 |
| H(27) | 1.3772 | 0.0139  | 0.5536  | 3.4350 |
| H(28) | 1.3463 | 0.0085  | 0.4260  | 3.4350 |
| H(29) | 1.3521 | 0.0830  | 0.4827  | 3.4350 |
| H(30) | 1.1978 | 0.0479  | 0.6536  | 3.5320 |
| H(31) | 1.1725 | 0.1179  | 0.5848  | 3.5320 |
| H(32) | 1.0526 | 0.0663  | 0.5907  | 3.5320 |
| H(33) | 1.0427 | -0.0520 | 0.4981  | 3.4686 |
| H(34) | 1.1551 | -0.0734 | 0.4339  | 3.4686 |
| H(35) | 1.1885 | -0.0686 | 0.5614  | 3.4686 |
| H(36) | 0.5709 | 0.0707  | 0.3702  | 4.0128 |
| H(37) | 0.6947 | 0.0194  | 0.3803  | 4.0128 |
| H(38) | 0.7087 | 0.0916  | 0.4440  | 4.0128 |
| H(39) | 0.7089 | 0.2041  | 0.3473  | 3.4120 |
| H(40) | 0.6900 | 0.2070  | 0.2199  | 3.4120 |
| H(41) | 0.5698 | 0.1842  | 0.2747  | 3.4120 |
| H(42) | 0.5376 | 0.0712  | 0.1711  | 3.1330 |
| H(43) | 0.6536 | 0.0920  | 0.1102  | 3.1330 |
| H(44) | 0.6596 | 0.0197  | 0.1728  | 3.1330 |
| H(45) | 0.6832 | -0.0190 | -0.0772 | 3.3798 |
| H(46) | 0.8294 | -0.0445 | -0.0817 | 3.3798 |
| H(47) | 0.8051 | 0.0076  | 0.0105  | 3.3798 |
| H(48) | 0.3470 | 0.0894  | -0.1551 | 2.7980 |
| H(49) | 0.4577 | 0.0431  | -0.1935 | 2.7980 |
| H(50) | 0.4682 | 0.0599  | -0.0694 | 2.7980 |
| H(51) | 0.6800 | 0.0311  | -0.3242 | 3.2581 |
| H(52) | 0.8032 | 0.0772  | -0.3411 | 3.2581 |
| H(53) | 0.8250 | -0.0016 | -0.3009 | 3.2581 |
| H(54) | 0.5080 | 0.2443  | -0.3025 | 3.3661 |
| H(55) | 0.4873 | 0.1677  | -0.3519 | 3.3661 |
| H(56) | 0.3722 | 0.2040  | -0.3039 | 3.3661 |
| H(57) | 1.2029 | 0.3536  | -0.1987 | 3.6625 |
| H(58) | 1.0930 | 0.3533  | -0.3057 | 3.6625 |
| H(59) | 1.1044 | 0.4182  | -0.2259 | 3.6625 |
| H(60) | 0.8316 | 0.4550  | -0.1338 | 4.1948 |
| H(61) | 0.6912 | 0.4695  | -0.2083 | 4.1948 |
| H(62) | 0.7163 | 0.4902  | -0.0846 | 4.1948 |
| H(63) | 0.4725 | 0.4080  | -0.0619 | 3.5444 |

|       |        |        |         |        |
|-------|--------|--------|---------|--------|
| H(64) | 0.4507 | 0.3872 | -0.1855 | 3.5444 |
| H(65) | 0.4561 | 0.3280 | -0.0967 | 3.5444 |
| H(66) | 0.8494 | 0.2906 | -0.3583 | 2.9754 |
| H(67) | 0.8423 | 0.2166 | -0.4164 | 2.9754 |
| H(68) | 0.7796 | 0.2263 | -0.3121 | 2.9754 |
| H(69) | 0.9594 | 0.4405 | 0.1512  | 3.9814 |
| H(70) | 0.8250 | 0.4821 | 0.1106  | 3.9814 |
| H(71) | 0.8719 | 0.4653 | 0.2350  | 3.9814 |
| H(72) | 0.6174 | 0.3942 | 0.2546  | 3.0619 |
| H(73) | 0.5519 | 0.4066 | 0.1318  | 3.0619 |
| H(74) | 0.5597 | 0.3297 | 0.1808  | 3.0619 |
| H(75) | 0.6901 | 0.3352 | -0.1610 | 2.3578 |
| H(76) | 0.8232 | 0.3280 | 0.1939  | 2.4209 |
| H(77) | 0.8906 | 0.0846 | -0.1332 | 2.0675 |
| H(78) | 0.5212 | 0.1930 | -0.1040 | 2.2516 |

$$B_{\text{eq}} = 8/3 \pi^2 (U_{11}(aa^*)^2 + U_{22}(bb^*)^2 + U_{33}(cc^*)^2 + 2U_{12}(aa^*bb^*)\cos \gamma + 2U_{13}(aa^*cc^*)\cos \beta + 2U_{23}(bb^*cc^*)\cos \alpha)$$

**Table 2. Anisotropic Displacement Parameters for 2**

| atom  | U <sub>11</sub> | U <sub>22</sub> | U <sub>33</sub> | U <sub>12</sub> | U <sub>13</sub> | U <sub>23</sub> |
|-------|-----------------|-----------------|-----------------|-----------------|-----------------|-----------------|
| Y(1)  | 0.0152(4)       | 0.0148(3)       | 0.0144(3)       | 0.0008(4)       | 0.0031(2)       | 0.0006(4)       |
| Si(1) | 0.022(1)        | 0.021(1)        | 0.025(1)        | -0.0002(10)     | -0.0028(10)     | -0.0018(9)      |
| Si(2) | 0.020(1)        | 0.021(1)        | 0.024(1)        | -0.0027(10)     | 0.0028(9)       | -0.0021(9)      |
| Si(3) | 0.023(1)        | 0.024(1)        | 0.030(1)        | 0.001(1)        | 0.0066(10)      | -0.0026(10)     |
| Si(4) | 0.022(1)        | 0.019(1)        | 0.033(1)        | 0.000(1)        | 0.005(1)        | 0.0012(10)      |
| O(1)  | 0.022(3)        | 0.019(3)        | 0.025(3)        | 0.003(2)        | 0.007(2)        | 0.012(2)        |
| N(1)  | 0.016(3)        | 0.024(3)        | 0.016(3)        | -0.001(4)       | 0.005(2)        | 0.002(4)        |
| N(2)  | 0.019(4)        | 0.023(4)        | 0.025(4)        | -0.004(3)       | 0.000(3)        | 0.001(3)        |
| N(3)  | 0.025(4)        | 0.022(4)        | 0.021(3)        | 0.003(3)        | 0.002(3)        | 0.001(3)        |
| N(4)  | 0.020(4)        | 0.009(3)        | 0.025(4)        | -0.007(3)       | 0.002(3)        | 0.002(3)        |
| N(5)  | 0.024(4)        | 0.016(3)        | 0.028(4)        | 0.007(3)        | 0.013(3)        | 0.008(3)        |
| C(1)  | 0.019(5)        | 0.015(4)        | 0.014(4)        | 0.002(3)        | 0.001(3)        | -0.000(3)       |
| C(2)  | 0.020(5)        | 0.014(4)        | 0.020(4)        | 0.001(3)        | 0.004(3)        | -0.002(3)       |
| C(3)  | 0.014(4)        | 0.014(4)        | 0.024(4)        | 0.003(3)        | 0.003(3)        | 0.002(3)        |
| C(4)  | 0.025(5)        | 0.016(4)        | 0.016(4)        | -0.000(3)       | 0.001(3)        | -0.001(3)       |
| C(5)  | 0.025(5)        | 0.017(4)        | 0.020(4)        | -0.001(4)       | 0.001(3)        | 0.001(3)        |
| C(6)  | 0.017(4)        | 0.018(4)        | 0.023(4)        | -0.004(3)       | 0.001(3)        | -0.003(3)       |
| C(7)  | 0.021(5)        | 0.026(5)        | 0.026(5)        | -0.001(4)       | 0.007(4)        | 0.003(3)        |
| C(8)  | 0.027(5)        | 0.045(6)        | 0.036(5)        | 0.001(4)        | 0.013(4)        | -0.005(4)       |
| C(9)  | 0.027(5)        | 0.060(7)        | 0.041(6)        | -0.006(5)       | 0.014(4)        | 0.022(5)        |
| C(10) | 0.021(5)        | 0.044(6)        | 0.031(5)        | -0.014(5)       | 0.002(4)        | -0.004(4)       |
| C(11) | 0.020(5)        | 0.024(5)        | 0.021(4)        | 0.006(4)        | -0.002(3)       | 0.006(3)        |
| C(12) | 0.045(6)        | 0.025(5)        | 0.035(5)        | -0.001(4)       | -0.003(4)       | 0.010(4)        |
| C(13) | 0.039(6)        | 0.044(6)        | 0.025(5)        | -0.001(5)       | 0.003(4)        | 0.007(4)        |
| C(14) | 0.028(6)        | 0.051(6)        | 0.024(5)        | 0.011(4)        | -0.002(4)       | 0.006(4)        |
| C(15) | 0.010(4)        | 0.025(5)        | 0.021(4)        | 0.004(3)        | 0.001(3)        | -0.005(3)       |
| C(16) | 0.023(5)        | 0.025(5)        | 0.022(4)        | 0.000(4)        | 0.005(3)        | 0.002(3)        |
| C(17) | 0.014(4)        | 0.027(5)        | 0.019(4)        | -0.004(3)       | -0.003(3)       | -0.001(3)       |
| C(18) | 0.038(6)        | 0.028(5)        | 0.021(4)        | -0.001(4)       | 0.003(4)        | -0.005(4)       |
| C(19) | 0.044(6)        | 0.047(6)        | 0.024(5)        | -0.008(5)       | 0.011(4)        | -0.002(4)       |
| C(20) | 0.035(6)        | 0.037(6)        | 0.029(5)        | -0.005(4)       | 0.001(4)        | 0.007(4)        |
| C(21) | 0.054(7)        | 0.037(6)        | 0.051(6)        | -0.010(5)       | -0.013(5)       | -0.004(5)       |
| C(22) | 0.021(5)        | 0.033(5)        | 0.021(4)        | -0.000(3)       | 0.008(3)        | 0.009(3)        |
| C(23) | 0.023(4)        | 0.038(4)        | 0.020(4)        | -0.002(5)       | 0.010(3)        | 0.005(5)        |
| C(24) | 0.019(5)        | 0.035(5)        | 0.022(4)        | -0.004(4)       | -0.002(4)       | 0.006(3)        |
| C(25) | 0.030(5)        | 0.031(5)        | 0.057(6)        | -0.009(4)       | 0.008(4)        | 0.008(5)        |
| C(26) | 0.036(5)        | 0.029(4)        | 0.021(4)        | -0.004(5)       | 0.014(3)        | 0.004(5)        |
| C(27) | 0.032(5)        | 0.045(7)        | 0.021(4)        | -0.006(4)       | 0.009(4)        | -0.001(4)       |
| C(28) | 0.039(6)        | 0.036(5)        | 0.025(5)        | 0.008(4)        | 0.003(4)        | -0.010(4)       |
| C(29) | 0.033(6)        | 0.025(5)        | 0.050(6)        | 0.007(4)        | 0.009(5)        | -0.002(4)       |
| C(30) | 0.015(5)        | 0.032(5)        | 0.038(5)        | -0.003(4)       | -0.000(4)       | 0.002(4)        |
| C(31) | 0.029(5)        | 0.032(6)        | 0.039(5)        | -0.007(4)       | -0.006(4)       | 0.004(4)        |
| C(32) | 0.029(6)        | 0.032(5)        | 0.045(6)        | 0.003(4)        | -0.007(4)       | 0.011(4)        |
| C(33) | 0.042(6)        | 0.027(5)        | 0.061(7)        | -0.006(5)       | 0.006(5)        | 0.014(5)        |
| C(34) | 0.029(5)        | 0.038(6)        | 0.034(5)        | -0.002(4)       | 0.015(4)        | -0.004(4)       |
| C(35) | 0.038(6)        | 0.041(6)        | 0.053(6)        | -0.004(5)       | 0.018(5)        | -0.026(5)       |

The general temperature factor expression:

$$\exp(-2\pi^2(a^*U_{11}h^2 + b^*U_{22}k^2 + c^*U_{33}l^2 + 2a^*b^*U_{12}hk + 2a^*c^*U_{13}hl + 2b^*c^*U_{23}kl))$$

**Table 3. Bond Lengths(Å) for 2**

| atom  | atom  | distance  | atom  | atom  | distance  |
|-------|-------|-----------|-------|-------|-----------|
| Y(1)  | O(1)  | 2.055(5)  | Y(1)  | N(1)  | 2.607(5)  |
| Y(1)  | N(3)  | 2.596(7)  | Y(1)  | N(4)  | 2.221(6)  |
| Y(1)  | N(5)  | 2.307(6)  | Si(1) | N(4)  | 1.705(6)  |
| Si(1) | C(30) | 1.840(9)  | Si(1) | C(31) | 1.873(9)  |
| Si(2) | N(4)  | 1.691(7)  | Si(2) | C(28) | 1.845(8)  |
| Si(2) | C(29) | 1.844(9)  | Si(3) | N(5)  | 1.692(6)  |
| Si(3) | C(34) | 1.865(10) | Si(3) | C(35) | 1.858(10) |
| Si(4) | N(5)  | 1.707(6)  | Si(4) | C(32) | 1.847(10) |
| Si(4) | C(33) | 1.859(9)  | O(1)  | C(1)  | 1.333(8)  |
| N(1)  | C(15) | 1.53(1)   | N(1)  | C(16) | 1.476(10) |
| N(1)  | C(22) | 1.479(9)  | N(2)  | C(17) | 1.442(9)  |
| N(2)  | C(18) | 1.46(1)   | N(2)  | C(20) | 1.485(10) |
| N(3)  | C(23) | 1.493(9)  | N(3)  | C(24) | 1.500(10) |
| N(3)  | C(26) | 1.491(9)  | C(1)  | C(2)  | 1.39(1)   |
| C(1)  | C(6)  | 1.43(1)   | C(2)  | C(3)  | 1.406(10) |
| C(2)  | C(15) | 1.50(1)   | C(3)  | C(4)  | 1.37(1)   |
| C(4)  | C(5)  | 1.39(1)   | C(4)  | C(11) | 1.551(10) |
| C(5)  | C(6)  | 1.40(1)   | C(6)  | C(7)  | 1.52(1)   |
| C(7)  | C(8)  | 1.50(1)   | C(7)  | C(9)  | 1.55(1)   |
| C(7)  | C(10) | 1.55(1)   | C(11) | C(12) | 1.50(1)   |
| C(11) | C(13) | 1.52(1)   | C(11) | C(14) | 1.53(1)   |
| C(16) | C(17) | 1.54(1)   | C(18) | C(19) | 1.50(1)   |
| C(20) | C(21) | 1.51(1)   | C(22) | C(23) | 1.50(1)   |
| C(24) | C(25) | 1.52(1)   | C(26) | C(27) | 1.51(1)   |

**Table 4. Bond Lengths(Å) for 2**

| atom  | atom  | distance | atom  | atom  | distance |
|-------|-------|----------|-------|-------|----------|
| Si(1) | H(78) | 0.95     | Si(2) | H(77) | 0.95     |
| Si(3) | H(76) | 0.95     | Si(4) | H(75) | 0.95     |
| C(3)  | H(2)  | 0.95     | C(5)  | H(1)  | 0.95     |
| C(8)  | H(39) | 0.95     | C(8)  | H(40) | 0.95     |
| C(8)  | H(41) | 0.95     | C(9)  | H(36) | 0.94     |
| C(9)  | H(37) | 0.95     | C(9)  | H(38) | 0.95     |
| C(10) | H(42) | 0.95     | C(10) | H(43) | 0.95     |
| C(10) | H(44) | 0.96     | C(12) | H(33) | 0.95     |
| C(12) | H(34) | 0.95     | C(12) | H(35) | 0.95     |
| C(13) | H(30) | 0.95     | C(13) | H(31) | 0.95     |
| C(13) | H(32) | 0.95     | C(14) | H(27) | 0.95     |
| C(14) | H(28) | 0.95     | C(14) | H(29) | 0.95     |
| C(15) | H(15) | 0.95     | C(15) | H(16) | 0.95     |
| C(16) | H(11) | 0.95     | C(16) | H(12) | 0.95     |
| C(17) | H(13) | 0.95     | C(17) | H(14) | 0.95     |
| C(18) | H(17) | 0.95     | C(18) | H(18) | 0.95     |
| C(19) | H(24) | 0.95     | C(19) | H(25) | 0.95     |
| C(19) | H(26) | 0.95     | C(20) | H(19) | 0.95     |
| C(20) | H(20) | 0.95     | C(21) | H(21) | 0.95     |
| C(21) | H(22) | 0.95     | C(21) | H(23) | 0.96     |
| C(22) | H(9)  | 0.95     | C(22) | H(10) | 0.95     |
| C(23) | H(7)  | 0.95     | C(23) | H(8)  | 0.95     |
| C(24) | H(5)  | 0.95     | C(24) | H(6)  | 0.95     |
| C(25) | H(57) | 0.95     | C(25) | H(58) | 0.95     |
| C(25) | H(59) | 0.94     | C(26) | H(3)  | 0.95     |
| C(26) | H(4)  | 0.95     | C(27) | H(66) | 0.95     |
| C(27) | H(67) | 0.95     | C(27) | H(68) | 0.95     |
| C(28) | H(51) | 0.95     | C(28) | H(52) | 0.95     |
| C(28) | H(53) | 0.95     | C(29) | H(45) | 0.95     |
| C(29) | H(46) | 0.95     | C(29) | H(47) | 0.95     |
| C(30) | H(48) | 0.94     | C(30) | H(49) | 0.95     |
| C(30) | H(50) | 0.95     | C(31) | H(54) | 0.95     |
| C(31) | H(55) | 0.95     | C(31) | H(56) | 0.95     |
| C(32) | H(63) | 0.96     | C(32) | H(64) | 0.94     |
| C(32) | H(65) | 0.95     | C(33) | H(60) | 0.94     |
| C(33) | H(61) | 0.96     | C(33) | H(62) | 0.95     |
| C(34) | H(72) | 0.95     | C(34) | H(73) | 0.95     |
| C(34) | H(74) | 0.95     | C(35) | H(69) | 0.94     |
| C(35) | H(70) | 0.96     | C(35) | H(71) | 0.95     |

**Table 5. Bond Angles (deg) for 2**

| atom  | atom  | atom  | angle    | atom  | atom  | atom  | angle    |
|-------|-------|-------|----------|-------|-------|-------|----------|
| O(1)  | Y(1)  | N(1)  | 76.2(2)  | O(1)  | Y(1)  | N(3)  | 141.1(2) |
| O(1)  | Y(1)  | N(4)  | 93.6(2)  | O(1)  | Y(1)  | N(5)  | 101.4(2) |
| N(1)  | Y(1)  | N(3)  | 70.8(2)  | N(1)  | Y(1)  | N(4)  | 141.5(2) |
| N(1)  | Y(1)  | N(5)  | 103.2(2) | N(3)  | Y(1)  | N(4)  | 99.5(2)  |
| N(3)  | Y(1)  | N(5)  | 105.6(2) | N(4)  | Y(1)  | N(5)  | 115.2(2) |
| N(4)  | Si(1) | C(30) | 115.1(3) | N(4)  | Si(1) | C(31) | 113.1(4) |
| C(30) | Si(1) | C(31) | 107.4(4) | Y(1)  | Si(2) | N(4)  | 42.3(2)  |
| Y(1)  | Si(2) | C(28) | 136.1(3) | Y(1)  | Si(2) | C(29) | 114.9(3) |
| N(4)  | Si(2) | C(28) | 114.2(3) | N(4)  | Si(2) | C(29) | 117.3(4) |
| C(28) | Si(2) | C(29) | 109.0(4) | N(5)  | Si(3) | C(34) | 114.0(4) |
| N(5)  | Si(3) | C(35) | 112.0(4) | C(34) | Si(3) | C(35) | 109.1(4) |
| N(5)  | Si(4) | C(32) | 116.4(4) | N(5)  | Si(4) | C(33) | 115.7(4) |
| C(32) | Si(4) | C(33) | 106.5(4) | Y(1)  | O(1)  | C(1)  | 146.0(5) |
| Y(1)  | N(1)  | C(15) | 101.7(4) | Y(1)  | N(1)  | C(16) | 110.7(4) |
| Y(1)  | N(1)  | C(22) | 110.6(4) | C(15) | N(1)  | C(16) | 111.8(5) |
| C(15) | N(1)  | C(22) | 109.7(6) | C(16) | N(1)  | C(22) | 111.9(6) |
| C(17) | N(2)  | C(18) | 114.6(6) | C(17) | N(2)  | C(20) | 108.5(6) |
| C(18) | N(2)  | C(20) | 112.6(6) | Y(1)  | N(3)  | C(23) | 105.5(4) |
| Y(1)  | N(3)  | C(24) | 105.0(5) | Y(1)  | N(3)  | C(26) | 118.4(5) |
| C(23) | N(3)  | C(24) | 111.9(6) | C(23) | N(3)  | C(26) | 105.5(6) |
| C(24) | N(3)  | C(26) | 110.5(6) | Y(1)  | N(4)  | Si(1) | 122.8(3) |
| Y(1)  | N(4)  | Si(2) | 106.9(3) | Si(1) | N(4)  | Si(2) | 127.7(4) |
| Y(1)  | N(5)  | Si(3) | 126.3(3) | Y(1)  | N(5)  | Si(4) | 109.3(3) |
| Si(3) | N(5)  | Si(4) | 124.2(4) | O(1)  | C(1)  | C(2)  | 118.8(7) |
| O(1)  | C(1)  | C(6)  | 121.2(7) | C(2)  | C(1)  | C(6)  | 120.0(6) |
| C(1)  | C(2)  | C(3)  | 120.4(7) | C(1)  | C(2)  | C(15) | 121.1(6) |
| C(3)  | C(2)  | C(15) | 118.5(7) | C(2)  | C(3)  | C(4)  | 120.9(7) |
| C(3)  | C(4)  | C(5)  | 118.4(7) | C(3)  | C(4)  | C(11) | 122.6(7) |
| C(5)  | C(4)  | C(11) | 119.0(7) | C(4)  | C(5)  | C(6)  | 123.4(7) |
| C(1)  | C(6)  | C(5)  | 116.9(7) | C(1)  | C(6)  | C(7)  | 121.2(6) |
| C(5)  | C(6)  | C(7)  | 122.0(7) | C(6)  | C(7)  | C(8)  | 110.8(7) |
| C(6)  | C(7)  | C(9)  | 111.4(6) | C(6)  | C(7)  | C(10) | 110.7(7) |
| C(8)  | C(7)  | C(9)  | 106.9(7) | C(8)  | C(7)  | C(10) | 109.4(7) |
| C(9)  | C(7)  | C(10) | 107.5(7) | C(4)  | C(11) | C(12) | 110.4(6) |
| C(4)  | C(11) | C(13) | 108.3(7) | C(4)  | C(11) | C(14) | 111.2(7) |
| C(12) | C(11) | C(13) | 109.7(7) | C(12) | C(11) | C(14) | 108.6(7) |
| C(13) | C(11) | C(14) | 108.6(6) | N(1)  | C(15) | C(2)  | 115.1(6) |
| N(1)  | C(16) | C(17) | 114.9(6) | N(2)  | C(17) | C(16) | 113.0(6) |
| N(2)  | C(18) | C(19) | 117.2(7) | N(2)  | C(20) | C(21) | 114.7(8) |
| N(1)  | C(22) | C(23) | 113.7(6) | N(3)  | C(23) | C(22) | 114.3(7) |
| N(3)  | C(24) | C(25) | 117.9(7) | N(3)  | C(26) | C(27) | 116.1(7) |



**Table 6. Bond Angles (deg) for 2**

| atom  | atom  | atom  | angle | atom  | atom  | atom  | angle |
|-------|-------|-------|-------|-------|-------|-------|-------|
| N(4)  | Si(1) | H(75) | 106.9 | C(30) | Si(1) | H(75) | 106.9 |
| C(31) | Si(1) | H(75) | 107.0 | N(4)  | Si(2) | H(76) | 105.0 |
| C(28) | Si(2) | H(76) | 105.1 | C(29) | Si(2) | H(76) | 105.1 |
| N(5)  | Si(3) | H(78) | 107.2 | C(34) | Si(3) | H(78) | 107.2 |
| C(35) | Si(3) | H(78) | 106.9 | N(5)  | Si(4) | H(77) | 105.8 |
| C(32) | Si(4) | H(77) | 105.5 | C(33) | Si(4) | H(77) | 105.9 |
| C(2)  | C(3)  | H(2)  | 119.6 | C(4)  | C(3)  | H(2)  | 119.5 |
| C(4)  | C(5)  | H(1)  | 118.4 | C(6)  | C(5)  | H(1)  | 118.2 |
| C(7)  | C(8)  | H(39) | 109.3 | C(7)  | C(8)  | H(40) | 108.9 |
| C(7)  | C(8)  | H(41) | 109.1 | H(39) | C(8)  | H(40) | 109.9 |
| H(39) | C(8)  | H(41) | 110.0 | H(40) | C(8)  | H(41) | 109.6 |
| C(7)  | C(9)  | H(36) | 109.3 | C(7)  | C(9)  | H(37) | 109.1 |
| C(7)  | C(9)  | H(38) | 108.8 | H(36) | C(9)  | H(37) | 110.4 |
| H(36) | C(9)  | H(38) | 109.7 | H(37) | C(9)  | H(38) | 109.6 |
| C(7)  | C(10) | H(42) | 109.6 | C(7)  | C(10) | H(43) | 109.6 |
| C(7)  | C(10) | H(44) | 109.0 | H(42) | C(10) | H(43) | 110.1 |
| H(42) | C(10) | H(44) | 109.2 | H(43) | C(10) | H(44) | 109.3 |
| C(11) | C(12) | H(33) | 109.3 | C(11) | C(12) | H(34) | 109.7 |
| C(11) | C(12) | H(35) | 109.4 | H(33) | C(12) | H(34) | 109.4 |
| H(33) | C(12) | H(35) | 109.3 | H(34) | C(12) | H(35) | 109.7 |
| C(11) | C(13) | H(30) | 109.1 | C(11) | C(13) | H(31) | 109.4 |
| C(11) | C(13) | H(32) | 109.3 | H(30) | C(13) | H(31) | 109.7 |
| H(30) | C(13) | H(32) | 109.7 | H(31) | C(13) | H(32) | 109.7 |
| C(11) | C(14) | H(27) | 109.4 | C(11) | C(14) | H(28) | 109.6 |
| C(11) | C(14) | H(29) | 109.4 | H(27) | C(14) | H(28) | 109.7 |
| H(27) | C(14) | H(29) | 109.3 | H(28) | C(14) | H(29) | 109.4 |
| N(1)  | C(15) | H(15) | 108.2 | N(1)  | C(15) | H(16) | 108.4 |
| C(2)  | C(15) | H(15) | 107.7 | C(2)  | C(15) | H(16) | 107.9 |
| H(15) | C(15) | H(16) | 109.5 | N(1)  | C(16) | H(11) | 108.3 |
| N(1)  | C(16) | H(12) | 108.0 | C(17) | C(16) | H(11) | 108.2 |
| C(17) | C(16) | H(12) | 108.1 | H(11) | C(16) | H(12) | 109.2 |
| N(2)  | C(17) | H(13) | 108.8 | N(2)  | C(17) | H(14) | 108.7 |
| C(16) | C(17) | H(13) | 108.5 | C(16) | C(17) | H(14) | 108.6 |
| H(13) | C(17) | H(14) | 109.3 | N(2)  | C(18) | H(17) | 107.8 |
| N(2)  | C(18) | H(18) | 107.5 | C(19) | C(18) | H(17) | 107.5 |
| C(19) | C(18) | H(18) | 107.2 | H(17) | C(18) | H(18) | 109.3 |
| C(18) | C(19) | H(24) | 109.5 | C(18) | C(19) | H(25) | 109.5 |
| C(18) | C(19) | H(26) | 109.3 | H(24) | C(19) | H(25) | 109.5 |
| H(24) | C(19) | H(26) | 109.5 | H(25) | C(19) | H(26) | 109.6 |
| N(2)  | C(20) | H(19) | 107.8 | N(2)  | C(20) | H(20) | 108.1 |
| C(21) | C(20) | H(19) | 108.5 | C(21) | C(20) | H(20) | 108.4 |
| H(19) | C(20) | H(20) | 109.2 | C(20) | C(21) | H(21) | 109.9 |
| C(20) | C(21) | H(22) | 109.6 | C(20) | C(21) | H(23) | 109.3 |
| H(21) | C(21) | H(22) | 109.8 | H(21) | C(21) | H(23) | 109.2 |
| H(22) | C(21) | H(23) | 108.9 | N(1)  | C(22) | H(9)  | 108.4 |
| N(1)  | C(22) | H(10) | 108.3 | C(23) | C(22) | H(9)  | 108.5 |
| C(23) | C(22) | H(10) | 108.4 | H(9)  | C(22) | H(10) | 109.5 |
| N(3)  | C(23) | H(7)  | 108.4 | N(3)  | C(23) | H(8)  | 108.2 |
| C(22) | C(23) | H(7)  | 108.3 | C(22) | C(23) | H(8)  | 108.0 |
| H(7)  | C(23) | H(8)  | 109.6 | N(3)  | C(24) | H(5)  | 107.4 |
| N(3)  | C(24) | H(6)  | 107.3 | C(25) | C(24) | H(5)  | 107.4 |
| C(25) | C(24) | H(6)  | 107.4 | H(5)  | C(24) | H(6)  | 109.3 |

|       |       |       |       |       |       |       |       |
|-------|-------|-------|-------|-------|-------|-------|-------|
| C(24) | C(25) | H(57) | 109.0 | C(24) | C(25) | H(58) | 109.1 |
| C(24) | C(25) | H(59) | 109.5 | H(57) | C(25) | H(58) | 109.3 |
| H(57) | C(25) | H(59) | 109.8 | H(58) | C(25) | H(59) | 110.0 |
| N(3)  | C(26) | H(3)  | 107.8 | N(3)  | C(26) | H(4)  | 107.7 |
| C(27) | C(26) | H(3)  | 107.9 | C(27) | C(26) | H(4)  | 107.8 |
| H(3)  | C(26) | H(4)  | 109.3 | C(26) | C(27) | H(66) | 109.6 |
| C(26) | C(27) | H(67) | 109.8 | C(26) | C(27) | H(68) | 109.6 |
| H(66) | C(27) | H(67) | 109.3 | H(66) | C(27) | H(68) | 109.1 |
| H(67) | C(27) | H(68) | 109.3 | Si(2) | C(28) | H(51) | 109.5 |
| Si(2) | C(28) | H(52) | 109.8 | Si(2) | C(28) | H(53) | 109.6 |
| H(51) | C(28) | H(52) | 109.5 | H(51) | C(28) | H(53) | 109.1 |
| H(52) | C(28) | H(53) | 109.3 | Si(2) | C(29) | H(45) | 109.0 |
| Si(2) | C(29) | H(46) | 109.5 | Si(2) | C(29) | H(47) | 109.5 |
| H(45) | C(29) | H(46) | 109.4 | H(45) | C(29) | H(47) | 109.5 |
| H(46) | C(29) | H(47) | 110.0 | Si(1) | C(30) | H(48) | 109.5 |
| Si(1) | C(30) | H(49) | 109.0 | Si(1) | C(30) | H(50) | 109.0 |
| H(48) | C(30) | H(49) | 110.2 | H(48) | C(30) | H(50) | 109.8 |
| H(49) | C(30) | H(50) | 109.3 | Si(1) | C(31) | H(54) | 109.4 |
| Si(1) | C(31) | H(55) | 109.4 | Si(1) | C(31) | H(56) | 109.2 |
| H(54) | C(31) | H(55) | 109.9 | H(54) | C(31) | H(56) | 109.4 |
| H(55) | C(31) | H(56) | 109.6 | Si(4) | C(32) | H(63) | 108.8 |
| Si(4) | C(32) | H(64) | 109.7 | Si(4) | C(32) | H(65) | 109.5 |
| H(63) | C(32) | H(64) | 109.4 | H(63) | C(32) | H(65) | 109.2 |
| H(64) | C(32) | H(65) | 110.3 | Si(4) | C(33) | H(60) | 109.8 |
| Si(4) | C(33) | H(61) | 109.1 | Si(4) | C(33) | H(62) | 109.5 |
| H(60) | C(33) | H(61) | 109.3 | H(60) | C(33) | H(62) | 110.1 |
| H(61) | C(33) | H(62) | 109.0 | Si(3) | C(34) | H(72) | 109.4 |
| Si(3) | C(34) | H(73) | 109.4 | Si(3) | C(34) | H(74) | 109.5 |
| H(72) | C(34) | H(73) | 109.4 | H(72) | C(34) | H(74) | 109.4 |
| H(73) | C(34) | H(74) | 109.6 | Si(3) | C(35) | H(69) | 110.3 |
| Si(3) | C(35) | H(70) | 109.4 | Si(3) | C(35) | H(71) | 109.8 |
| H(69) | C(35) | H(70) | 109.2 | H(69) | C(35) | H(71) | 109.7 |
| H(70) | C(35) | H(71) | 108.4 |       |       |       |       |

**Table 7. Torsion Angles (deg) for 2**

| atom  | atom  | atom  | atom  | angle     | atom  | atom  | atom  | atom  | angle     |
|-------|-------|-------|-------|-----------|-------|-------|-------|-------|-----------|
| Y(1)  | O(1)  | C(1)  | C(2)  | -9(1)     | Y(1)  | O(1)  | C(1)  | C(6)  | 171.0(6)  |
| Y(1)  | N(1)  | C(15) | C(2)  | -74.9(6)  | Y(1)  | N(1)  | C(16) | C(17) | 170.5(5)  |
| Y(1)  | N(1)  | C(22) | C(23) | -30.2(8)  | Y(1)  | N(3)  | C(23) | C(22) | -51.0(8)  |
| Y(1)  | N(3)  | C(24) | C(25) | 172.1(5)  | Y(1)  | N(3)  | C(26) | C(27) | 62.6(9)   |
| Y(1)  | N(4)  | Si(1) | C(30) | -131.9(4) | Y(1)  | N(4)  | Si(1) | C(31) | 104.1(4)  |
| Y(1)  | N(4)  | Si(2) | C(28) | -132.9(4) | Y(1)  | N(4)  | Si(2) | C(29) | 97.9(4)   |
| Y(1)  | N(5)  | Si(3) | C(34) | -118.2(5) | Y(1)  | N(5)  | Si(3) | C(35) | 117.2(5)  |
| Y(1)  | N(5)  | Si(4) | C(32) | 113.0(4)  | Y(1)  | N(5)  | Si(4) | C(33) | -120.7(4) |
| Si(1) | N(4)  | Y(1)  | Si(2) | 163.0(6)  | Si(1) | N(4)  | Y(1)  | O(1)  | 89.1(4)   |
| Si(1) | N(4)  | Y(1)  | N(1)  | 161.3(3)  | Si(1) | N(4)  | Y(1)  | N(3)  | -127.6(4) |
| Si(1) | N(4)  | Y(1)  | N(5)  | -15.3(4)  | Si(1) | N(4)  | Si(2) | C(28) | 65.1(6)   |
| Si(1) | N(4)  | Si(2) | C(29) | -64.1(6)  | Si(2) | Y(1)  | O(1)  | C(1)  | 100.5(8)  |
| Si(2) | Y(1)  | N(1)  | C(15) | -33.7(4)  | Si(2) | Y(1)  | N(1)  | C(16) | -152.7(5) |
| Si(2) | Y(1)  | N(1)  | C(22) | 82.8(5)   | Si(2) | Y(1)  | N(3)  | C(23) | -89.2(5)  |
| Si(2) | Y(1)  | N(3)  | C(24) | 152.5(4)  | Si(2) | Y(1)  | N(3)  | C(26) | 28.6(5)   |
| Si(2) | Y(1)  | N(5)  | Si(3) | 126.1(3)  | Si(2) | Y(1)  | N(5)  | Si(4) | -49.8(5)  |
| Si(2) | N(4)  | Y(1)  | O(1)  | -73.9(3)  | Si(2) | N(4)  | Y(1)  | N(1)  | -1.7(5)   |
| Si(2) | N(4)  | Y(1)  | N(3)  | 69.3(3)   | Si(2) | N(4)  | Y(1)  | N(5)  | -178.4(3) |
| Si(2) | N(4)  | Si(1) | C(30) | 27.5(6)   | Si(2) | N(4)  | Si(1) | C(31) | -96.6(5)  |
| Si(3) | N(5)  | Y(1)  | O(1)  | 28.0(4)   | Si(3) | N(5)  | Y(1)  | N(1)  | -50.3(4)  |
| Si(3) | N(5)  | Y(1)  | N(3)  | -123.8(4) | Si(3) | N(5)  | Y(1)  | N(4)  | 127.5(4)  |
| Si(3) | N(5)  | Si(4) | C(32) | -62.9(6)  | Si(3) | N(5)  | Si(4) | C(33) | 63.3(6)   |
| Si(4) | N(5)  | Y(1)  | O(1)  | -147.9(3) | Si(4) | N(5)  | Y(1)  | N(1)  | 133.9(3)  |
| Si(4) | N(5)  | Y(1)  | N(3)  | 60.4(3)   | Si(4) | N(5)  | Y(1)  | N(4)  | -48.3(4)  |
| Si(4) | N(5)  | Si(3) | C(34) | 57.0(6)   | Si(4) | N(5)  | Si(3) | C(35) | -67.5(6)  |
| O(1)  | Y(1)  | Si(2) | N(4)  | 105.7(3)  | O(1)  | Y(1)  | Si(2) | C(28) | -179.7(4) |
| O(1)  | Y(1)  | Si(2) | C(29) | 1.8(4)    | O(1)  | Y(1)  | N(1)  | C(15) | 45.4(4)   |
| O(1)  | Y(1)  | N(1)  | C(16) | -73.6(5)  | O(1)  | Y(1)  | N(1)  | C(22) | 161.9(6)  |
| O(1)  | Y(1)  | N(3)  | C(23) | -9.8(6)   | O(1)  | Y(1)  | N(3)  | C(24) | -128.2(4) |
| O(1)  | Y(1)  | N(3)  | C(26) | 107.9(6)  | O(1)  | C(1)  | C(2)  | C(3)  | 178.9(6)  |
| O(1)  | C(1)  | C(2)  | C(15) | -4(1)     | O(1)  | C(1)  | C(6)  | C(5)  | -179.0(6) |
| O(1)  | C(1)  | C(6)  | C(7)  | 0(1)      | N(1)  | Y(1)  | Si(2) | N(4)  | 178.8(3)  |
| N(1)  | Y(1)  | Si(2) | C(28) | -106.6(4) | N(1)  | Y(1)  | Si(2) | C(29) | 74.9(4)   |
| N(1)  | Y(1)  | O(1)  | C(1)  | -12.3(8)  | N(1)  | Y(1)  | N(3)  | C(23) | 23.6(5)   |
| N(1)  | Y(1)  | N(3)  | C(24) | -94.7(4)  | N(1)  | Y(1)  | N(3)  | C(26) | 141.4(6)  |
| N(1)  | C(15) | C(2)  | C(1)  | 56.4(9)   | N(1)  | C(15) | C(2)  | C(3)  | -126.7(7) |
| N(1)  | C(16) | C(17) | N(2)  | 169.4(6)  | N(1)  | C(22) | C(23) | N(3)  | 58.4(10)  |
| N(3)  | Y(1)  | Si(2) | N(4)  | -112.6(3) | N(3)  | Y(1)  | Si(2) | C(28) | -38.0(4)  |
| N(3)  | Y(1)  | Si(2) | C(29) | 143.5(4)  | N(3)  | Y(1)  | O(1)  | C(1)  | 20.1(10)  |
| N(3)  | Y(1)  | N(1)  | C(15) | -113.7(4) | N(3)  | Y(1)  | N(1)  | C(16) | 127.3(5)  |
| N(3)  | Y(1)  | N(1)  | C(22) | 2.8(5)    | N(4)  | Y(1)  | Si(2) | C(28) | 74.6(5)   |
| N(4)  | Y(1)  | Si(2) | C(29) | -103.9(4) | N(4)  | Y(1)  | O(1)  | C(1)  | 130.1(8)  |
| N(4)  | Y(1)  | N(1)  | C(15) | -32.7(5)  | N(4)  | Y(1)  | N(1)  | C(16) | -151.7(5) |
| N(4)  | Y(1)  | N(1)  | C(22) | 83.7(6)   | N(4)  | Y(1)  | N(3)  | C(23) | -117.8(5) |
| N(4)  | Y(1)  | N(3)  | C(24) | 123.8(4)  | N(4)  | Y(1)  | N(3)  | C(26) | -0.1(6)   |
| N(4)  | Si(2) | Y(1)  | N(5)  | 2.6(4)    | N(5)  | Y(1)  | Si(2) | C(28) | 77.2(5)   |
| N(5)  | Y(1)  | Si(2) | C(29) | -101.3(4) | N(5)  | Y(1)  | O(1)  | C(1)  | -113.3(8) |
| N(5)  | Y(1)  | N(1)  | C(15) | 144.1(4)  | N(5)  | Y(1)  | N(1)  | C(16) | 25.2(5)   |
| N(5)  | Y(1)  | N(1)  | C(22) | -99.4(5)  | N(5)  | Y(1)  | N(3)  | C(23) | 122.5(5)  |
| N(5)  | Y(1)  | N(3)  | C(24) | 4.2(5)    | N(5)  | Y(1)  | N(3)  | C(26) | -119.7(5) |
| C(1)  | C(2)  | C(3)  | C(4)  | 0(1)      | C(1)  | C(6)  | C(5)  | C(4)  | 0(1)      |

|       |       |       |       |           |       |       |       |       |           |
|-------|-------|-------|-------|-----------|-------|-------|-------|-------|-----------|
| C(1)  | C(6)  | C(7)  | C(8)  | -64.2(9)  | C(1)  | C(6)  | C(7)  | C(9)  | 177.0(7)  |
| C(1)  | C(6)  | C(7)  | C(10) | 57.5(10)  | C(2)  | C(1)  | C(6)  | C(5)  | 1(1)      |
| C(2)  | C(1)  | C(6)  | C(7)  | -179.2(7) | C(2)  | C(3)  | C(4)  | C(5)  | 1(1)      |
| C(2)  | C(3)  | C(4)  | C(11) | -178.8(7) | C(2)  | C(15) | N(1)  | C(16) | 43.3(8)   |
| C(2)  | C(15) | N(1)  | C(22) | 168.1(6)  | C(3)  | C(2)  | C(1)  | C(6)  | -1(1)     |
| C(3)  | C(4)  | C(5)  | C(6)  | -1(1)     | C(3)  | C(4)  | C(11) | C(12) | -115.7(9) |
| C(3)  | C(4)  | C(11) | C(13) | 124.2(8)  | C(3)  | C(4)  | C(11) | C(14) | 4(1)      |
| C(4)  | C(3)  | C(2)  | C(15) | -177.3(7) | C(4)  | C(5)  | C(6)  | C(7)  | -179.3(7) |
| C(5)  | C(4)  | C(11) | C(12) | 63.6(10)  | C(5)  | C(4)  | C(11) | C(13) | -56.5(9)  |
| C(5)  | C(4)  | C(11) | C(14) | -175.8(7) | C(5)  | C(6)  | C(7)  | C(8)  | 115.5(8)  |
| C(5)  | C(6)  | C(7)  | C(9)  | -3(1)     | C(5)  | C(6)  | C(7)  | C(10) | -122.8(8) |
| C(6)  | C(1)  | C(2)  | C(15) | 175.7(7)  | C(6)  | C(5)  | C(4)  | C(11) | 178.7(7)  |
| C(15) | N(1)  | C(16) | C(17) | 57.9(8)   | C(15) | N(1)  | C(22) | C(23) | 81.1(8)   |
| C(16) | N(1)  | C(22) | C(23) | -154.1(7) | C(16) | C(17) | N(2)  | C(18) | 48.7(9)   |
| C(16) | C(17) | N(2)  | C(20) | 175.3(6)  | C(17) | N(2)  | C(18) | C(19) | 59.5(9)   |
| C(17) | N(2)  | C(20) | C(21) | 175.6(7)  | C(17) | C(16) | N(1)  | C(22) | -65.6(8)  |
| C(18) | N(2)  | C(20) | C(21) | -56.5(10) | C(19) | C(18) | N(2)  | C(20) | -65.0(9)  |
| C(22) | C(23) | N(3)  | C(24) | 62.6(9)   | C(22) | C(23) | N(3)  | C(26) | -177.1(7) |
| C(23) | N(3)  | C(24) | C(25) | 58.1(8)   | C(23) | N(3)  | C(26) | C(27) | -179.6(7) |
| C(24) | N(3)  | C(26) | C(27) | -58.5(9)  | C(25) | C(24) | N(3)  | C(26) | -59.2(8)  |

Figure 1.  $^1\text{H}$ - $^1\text{H}$  correlation spectra of 2 (500 MHz,  $d_8$ -toluene, 233 K).

IWI-092, cosy, d8-tol, 233 K, Nov-10-2005, DRX-500, exp 233

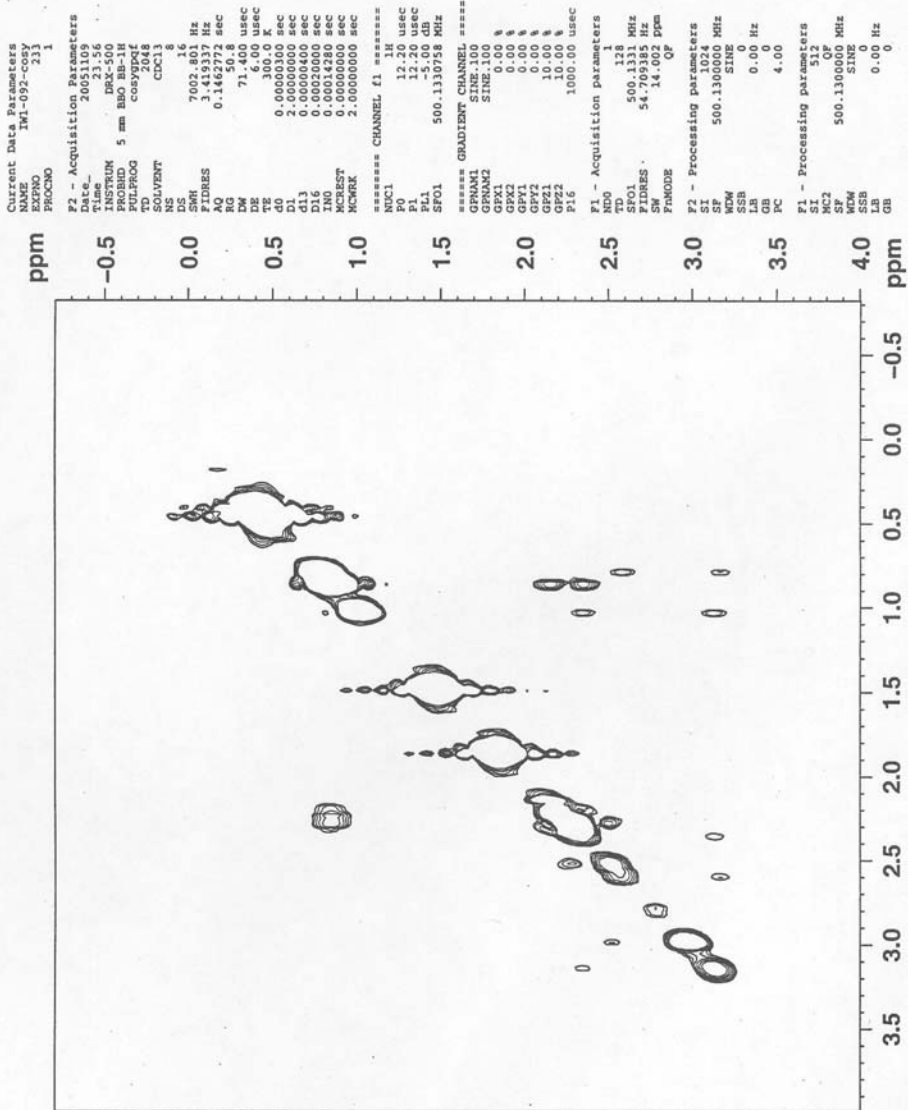

Figure 2.  $^1\text{H}$ - $^1\text{H}$  correlation spectra of 2 (500 MHz,  $d_8$ -toluene, 253 K).

IW1-092, cosy, d8-tol, 253 K, Nov-10-2005, DRX-500, exp 253

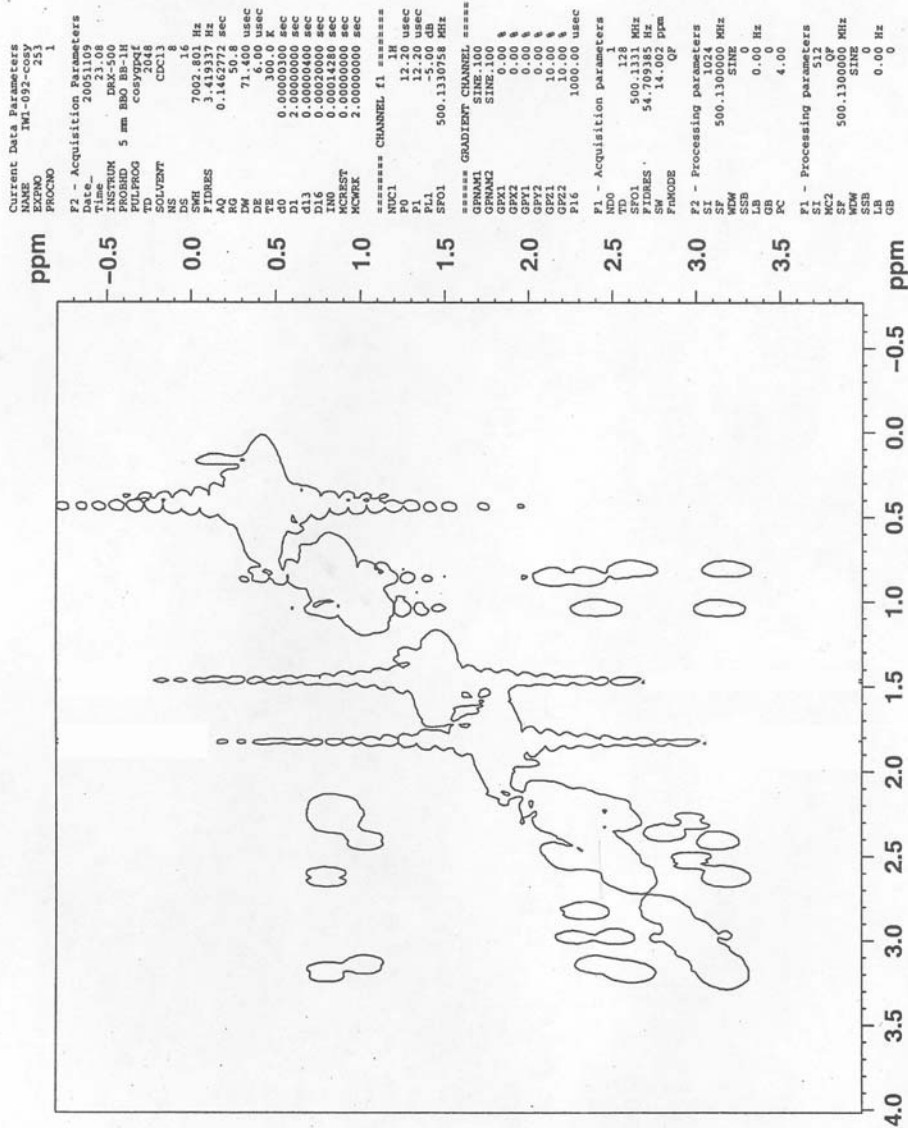

Figure 3.  $^1\text{H}$ - $^1\text{H}$  correlation spectra of 2 (500 MHz,  $d_8$ -toluene, 273 K).

IW1-092, cosy, d8-tol, 273 K, Vov-10-2005, DRX-500, exp 273

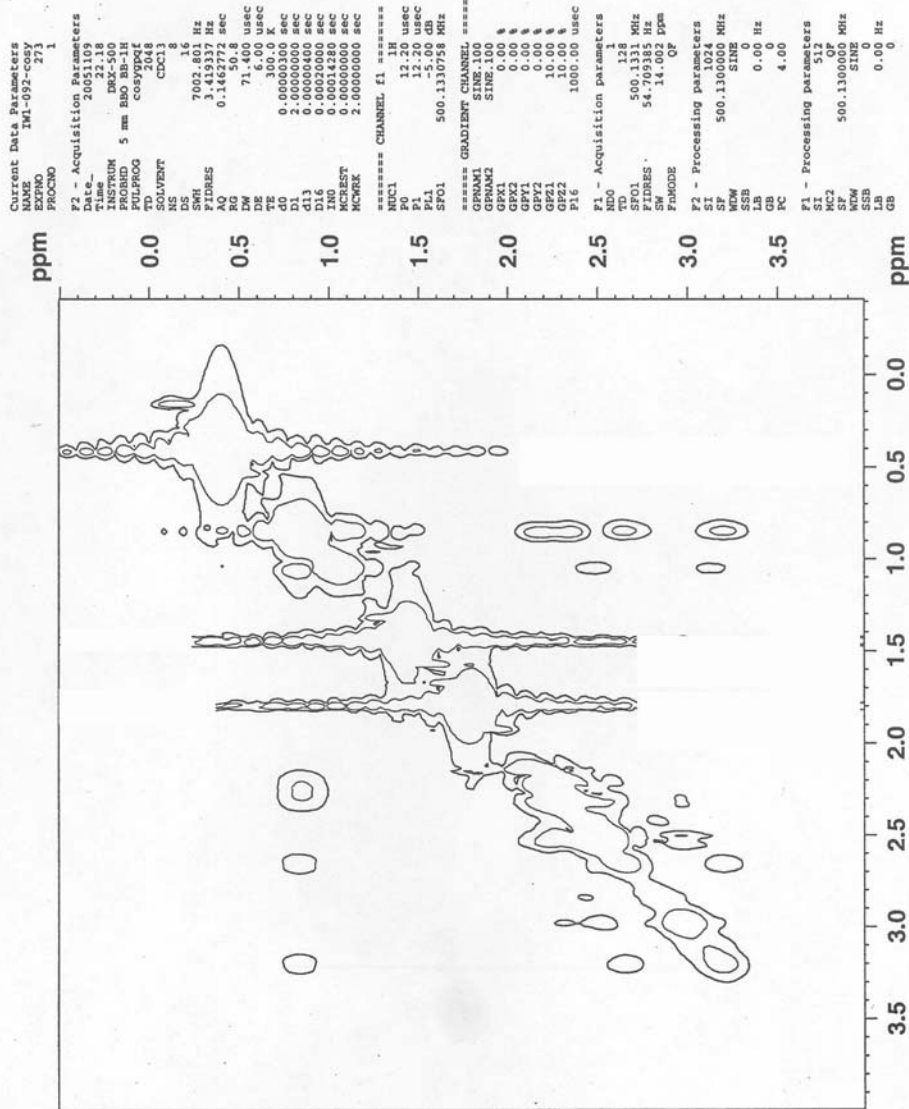

Figure 4.  $^1\text{H}$ - $^1\text{H}$  correlation spectra of 2 (500 MHz,  $d_8$ -toluene, 353 K).

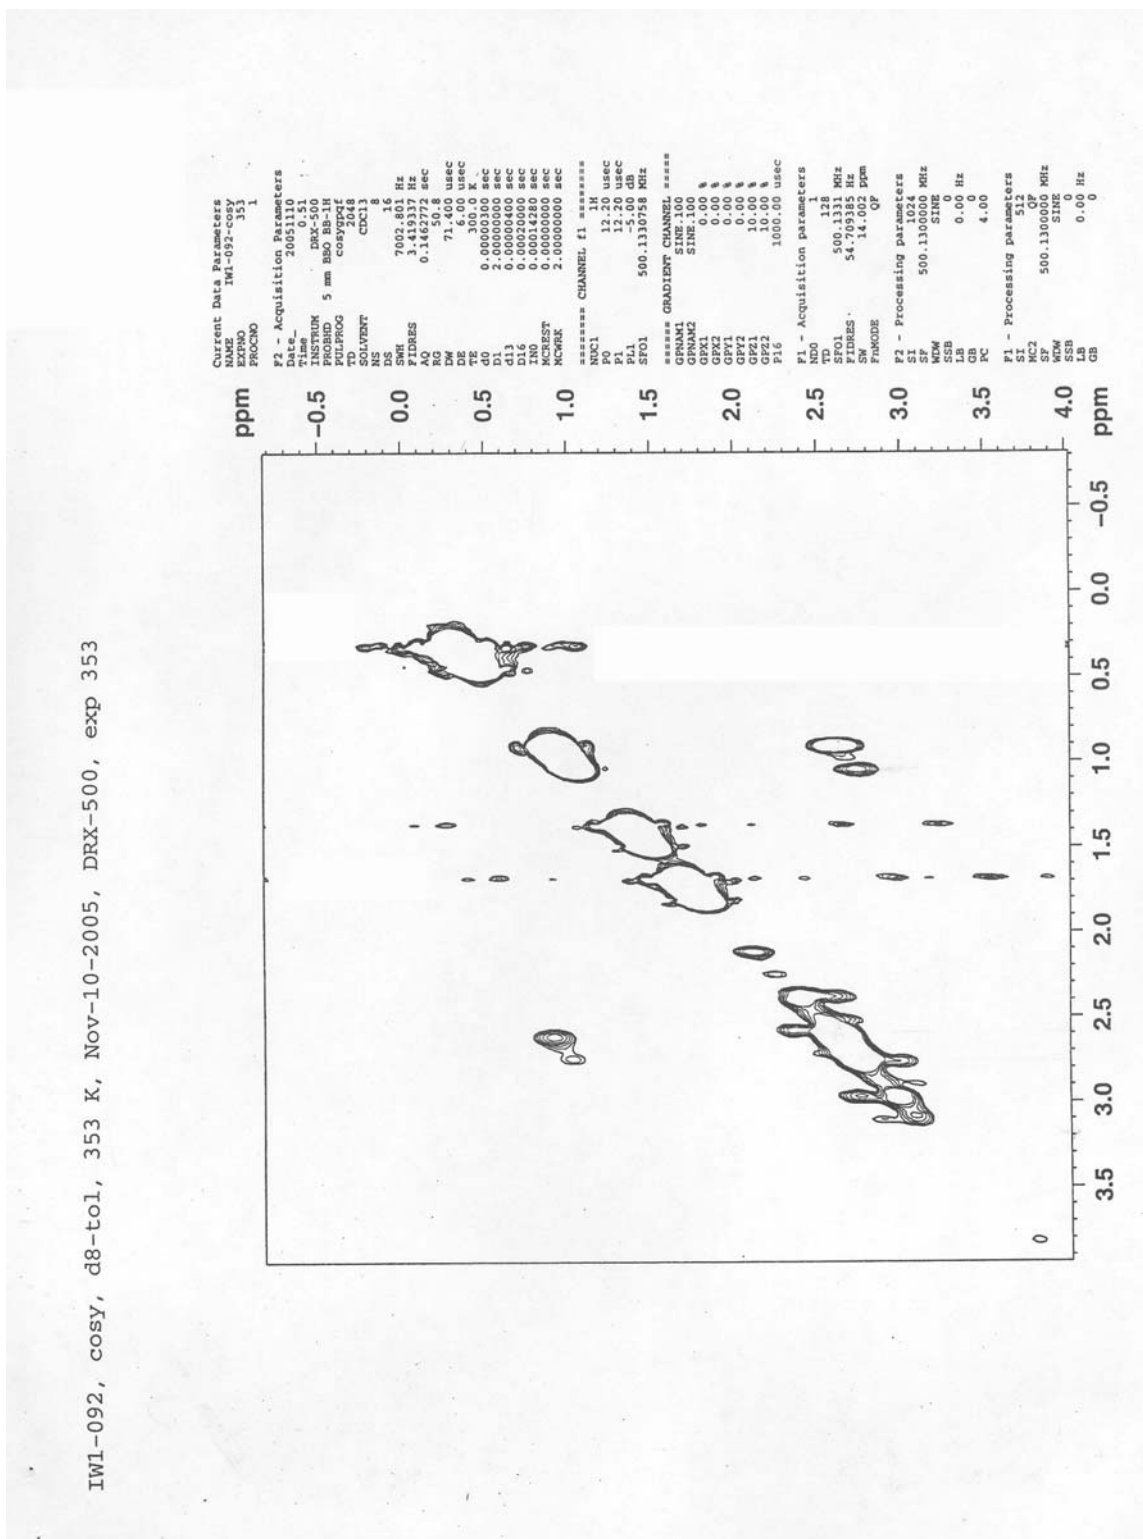



Figure 5.  $^1\text{H}$  NMR spectra of  $\text{LiL}^1$  (500 MHz,  $d_8$ -toluene, 193 K).

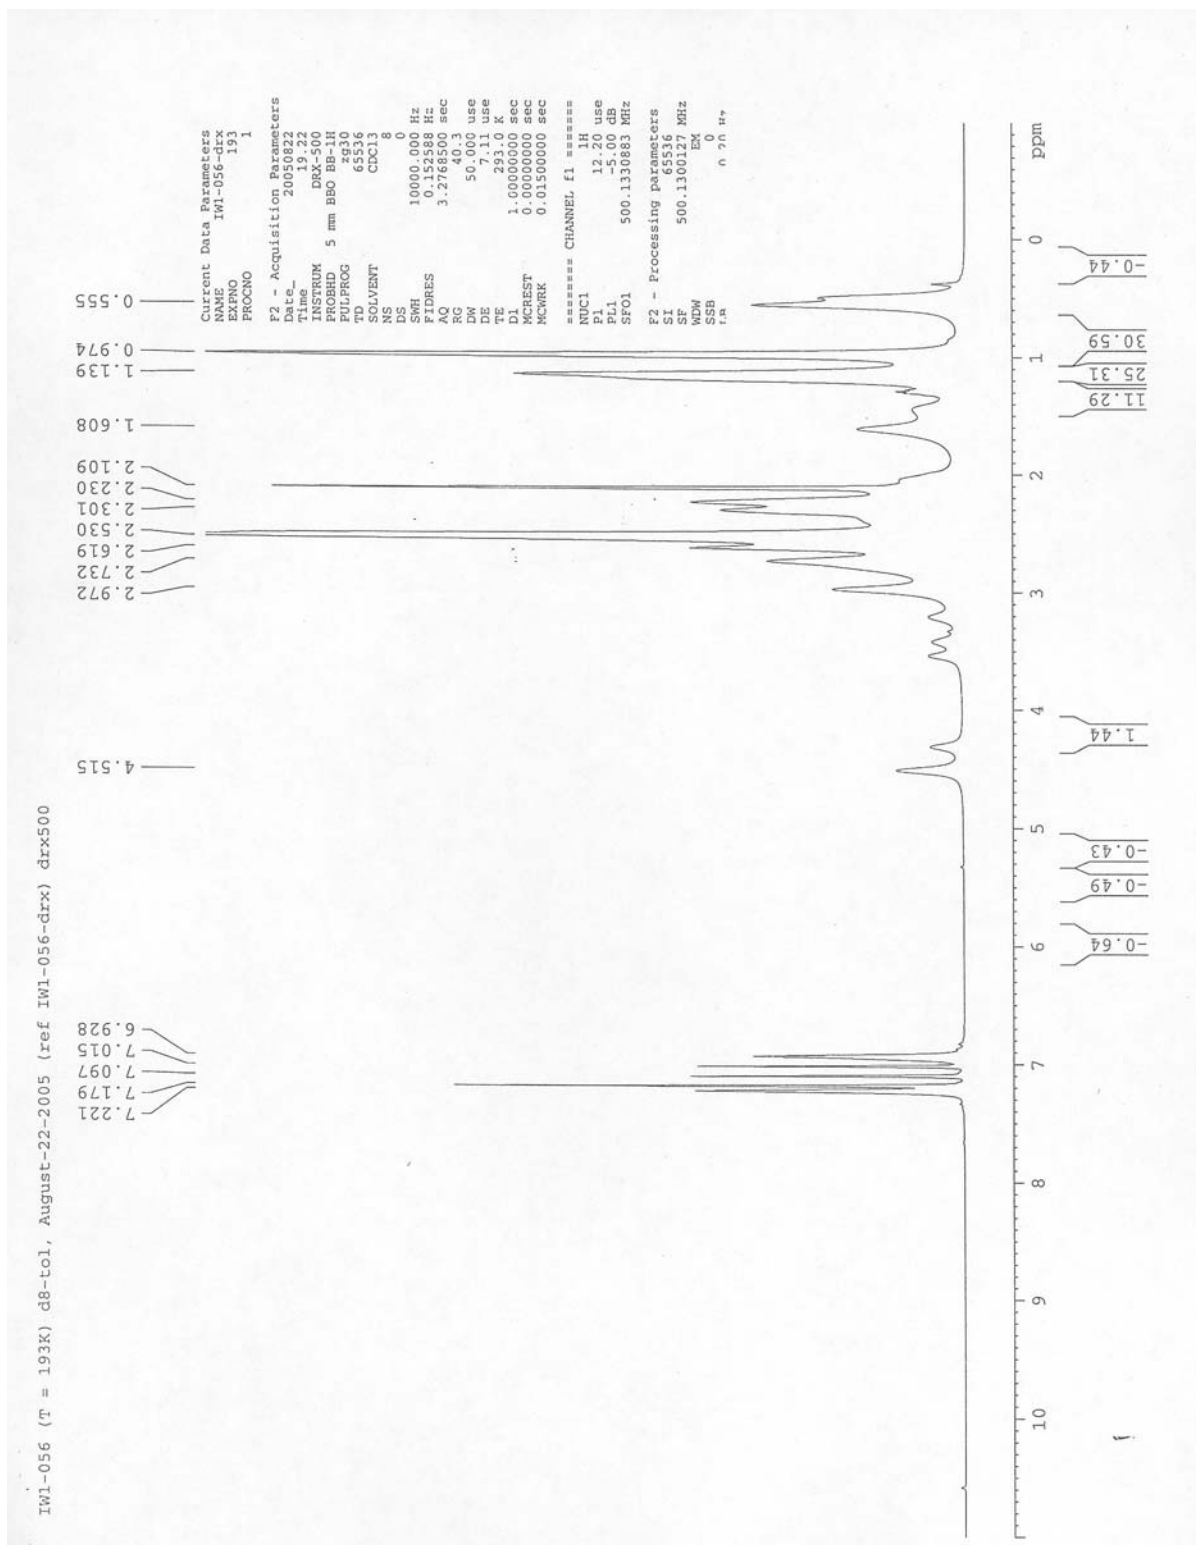

Figure 6.  $^1\text{H}$  NMR spectra of  $\text{LiL}^1$  (500 MHz,  $d_8$ -toluene, 213 K).

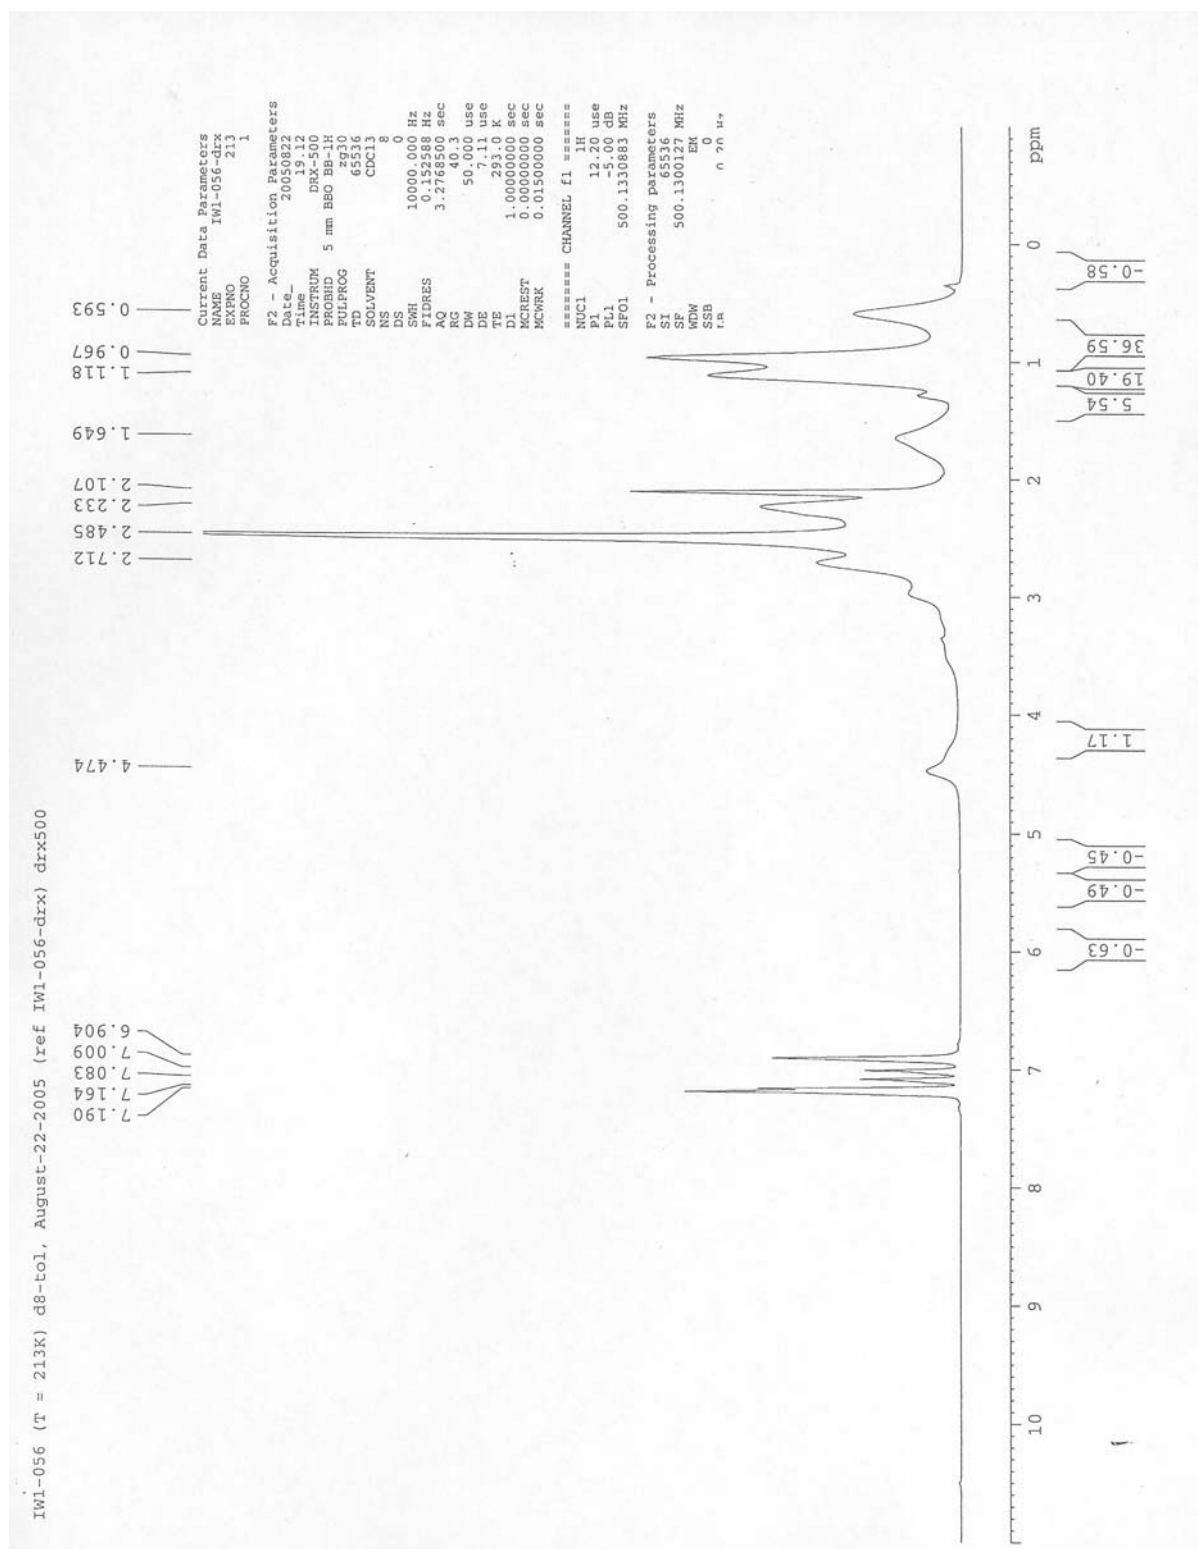

Figure 7.  $^1\text{H}$  NMR spectra of  $\text{LiL}^1$  (500 MHz,  $d_8$ -toluene, 233 K).

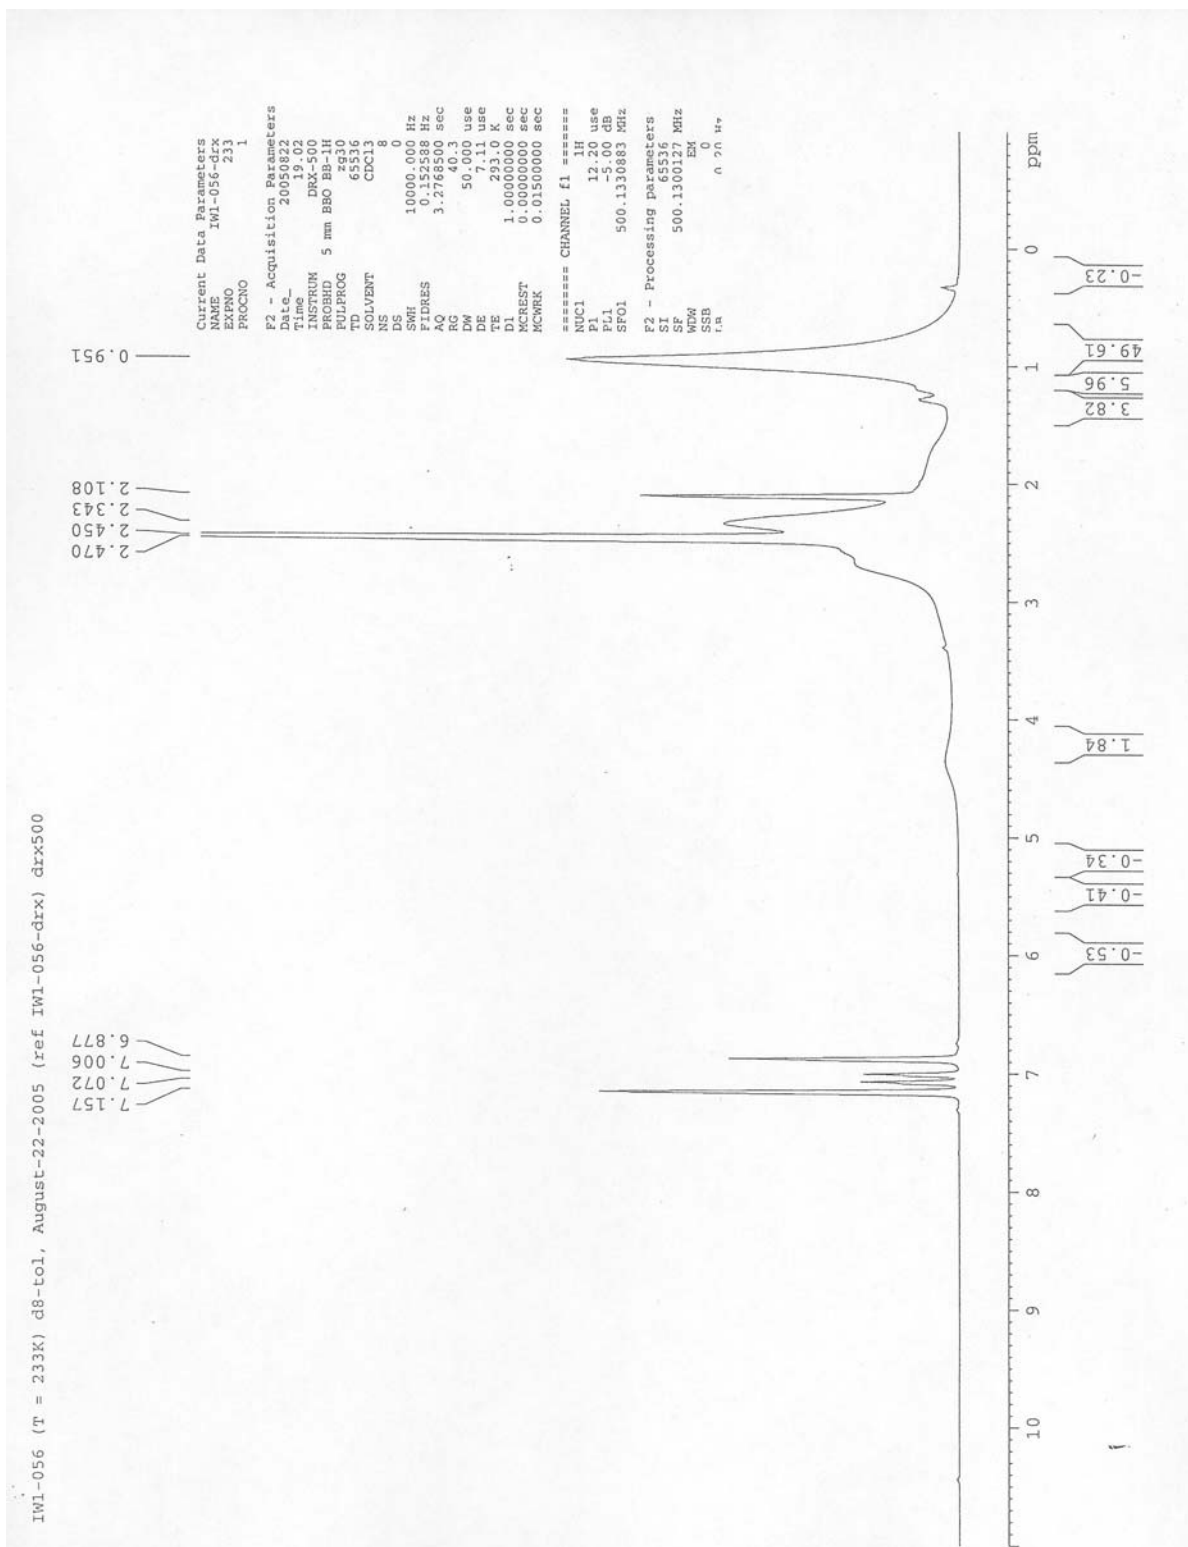

Figure 8.  $^1\text{H}$  NMR spectra of  $\text{LiL}^1$  (500 MHz,  $d_8$ -toluene, 253 K).

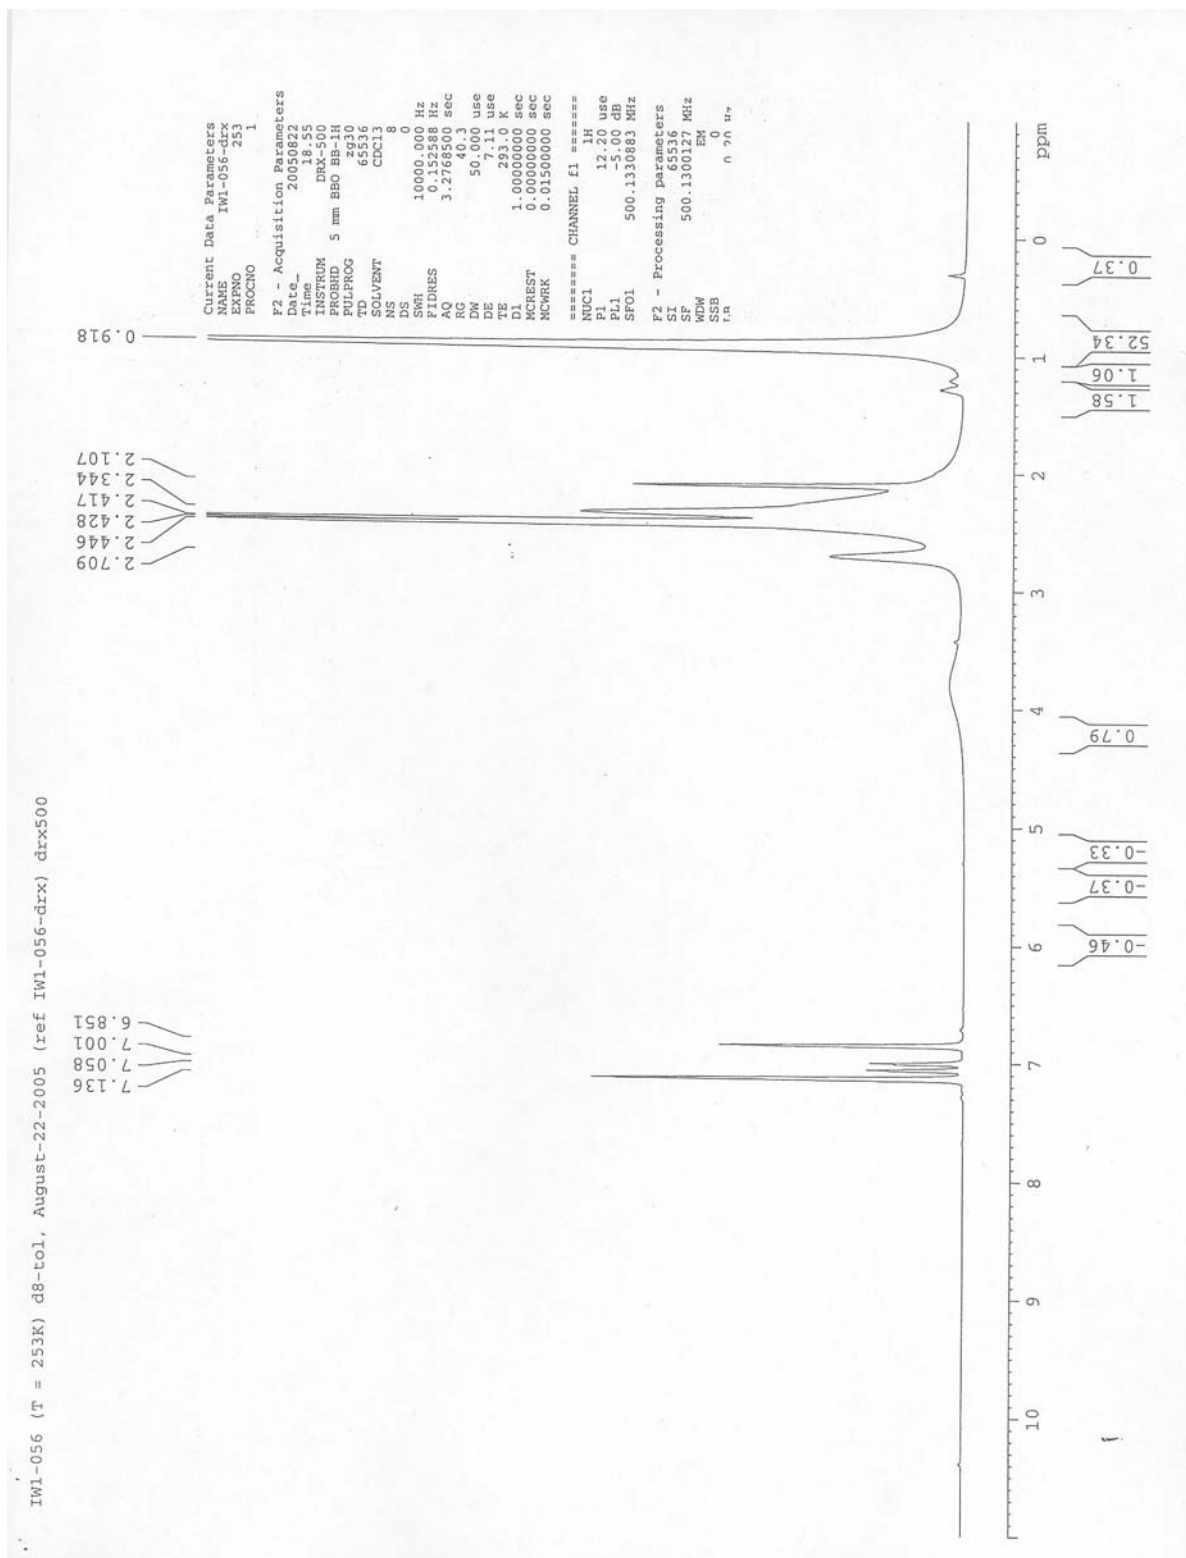

Figure 9.  $^1\text{H}$  NMR spectra of  $\text{LiL}^1$  (500 MHz,  $d_8$ -toluene, 273 K).

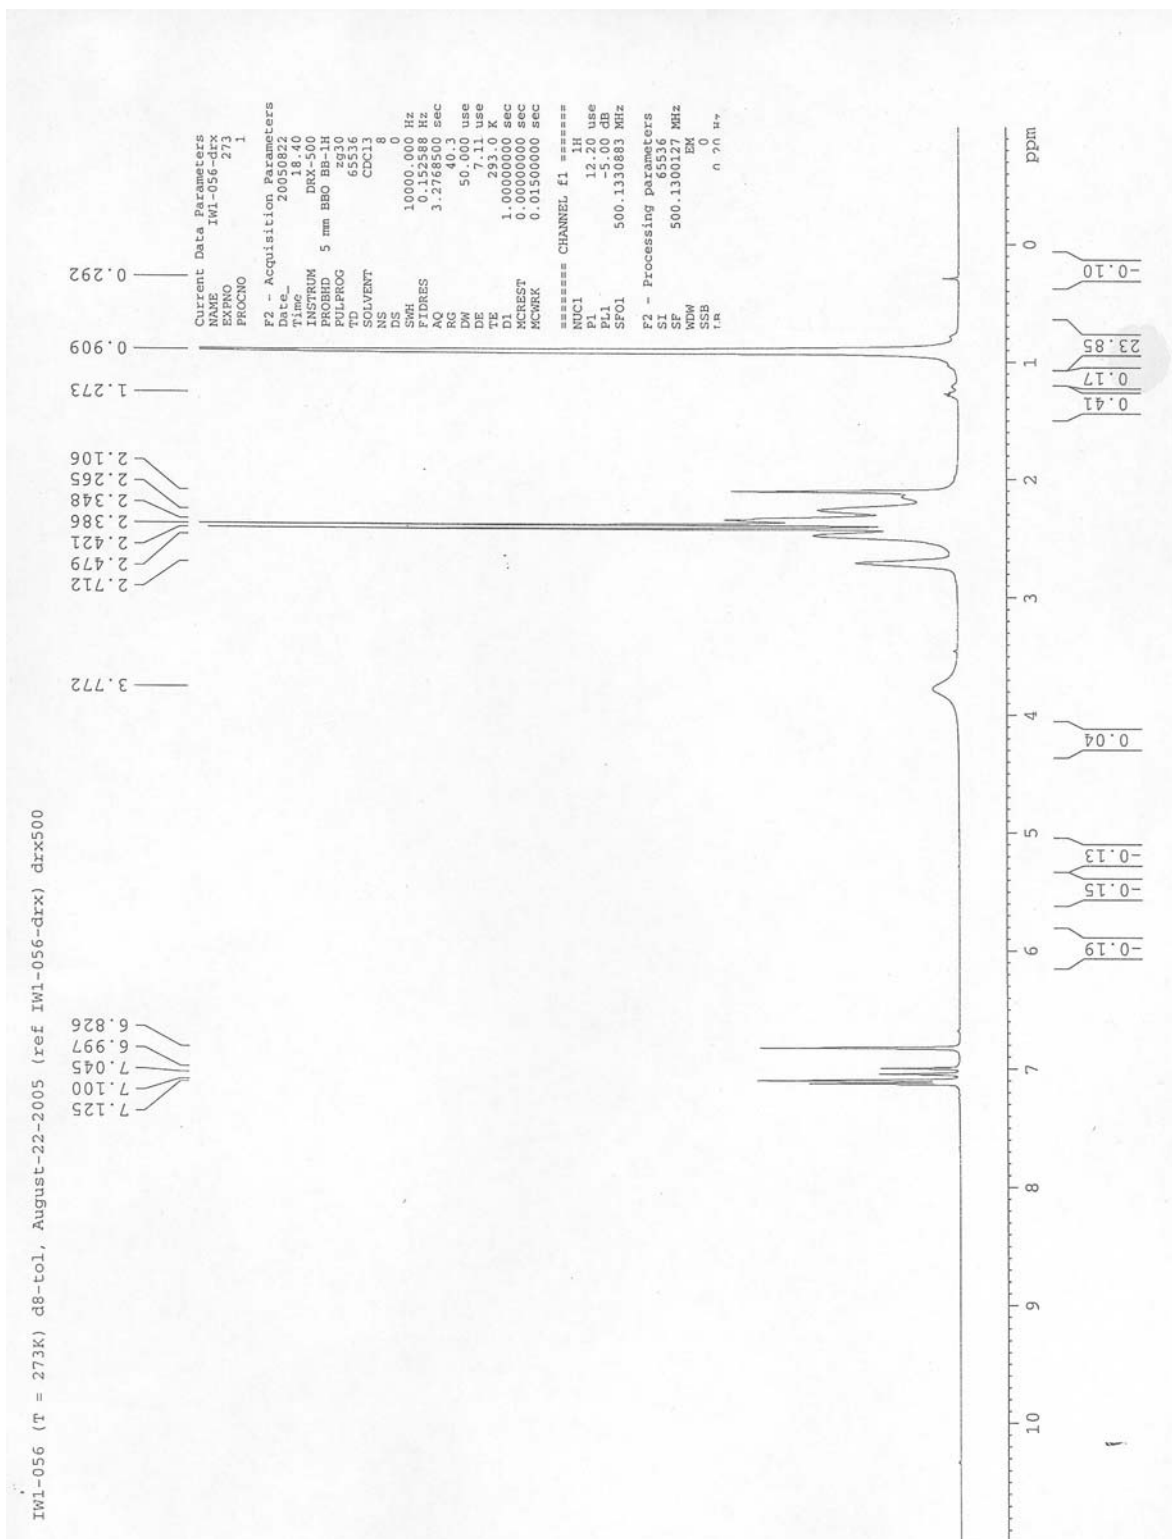

Figure 10. <sup>1</sup>H NMR spectra of LiL<sup>1</sup> (500 MHz, d<sub>8</sub>-toluene, 298 K).

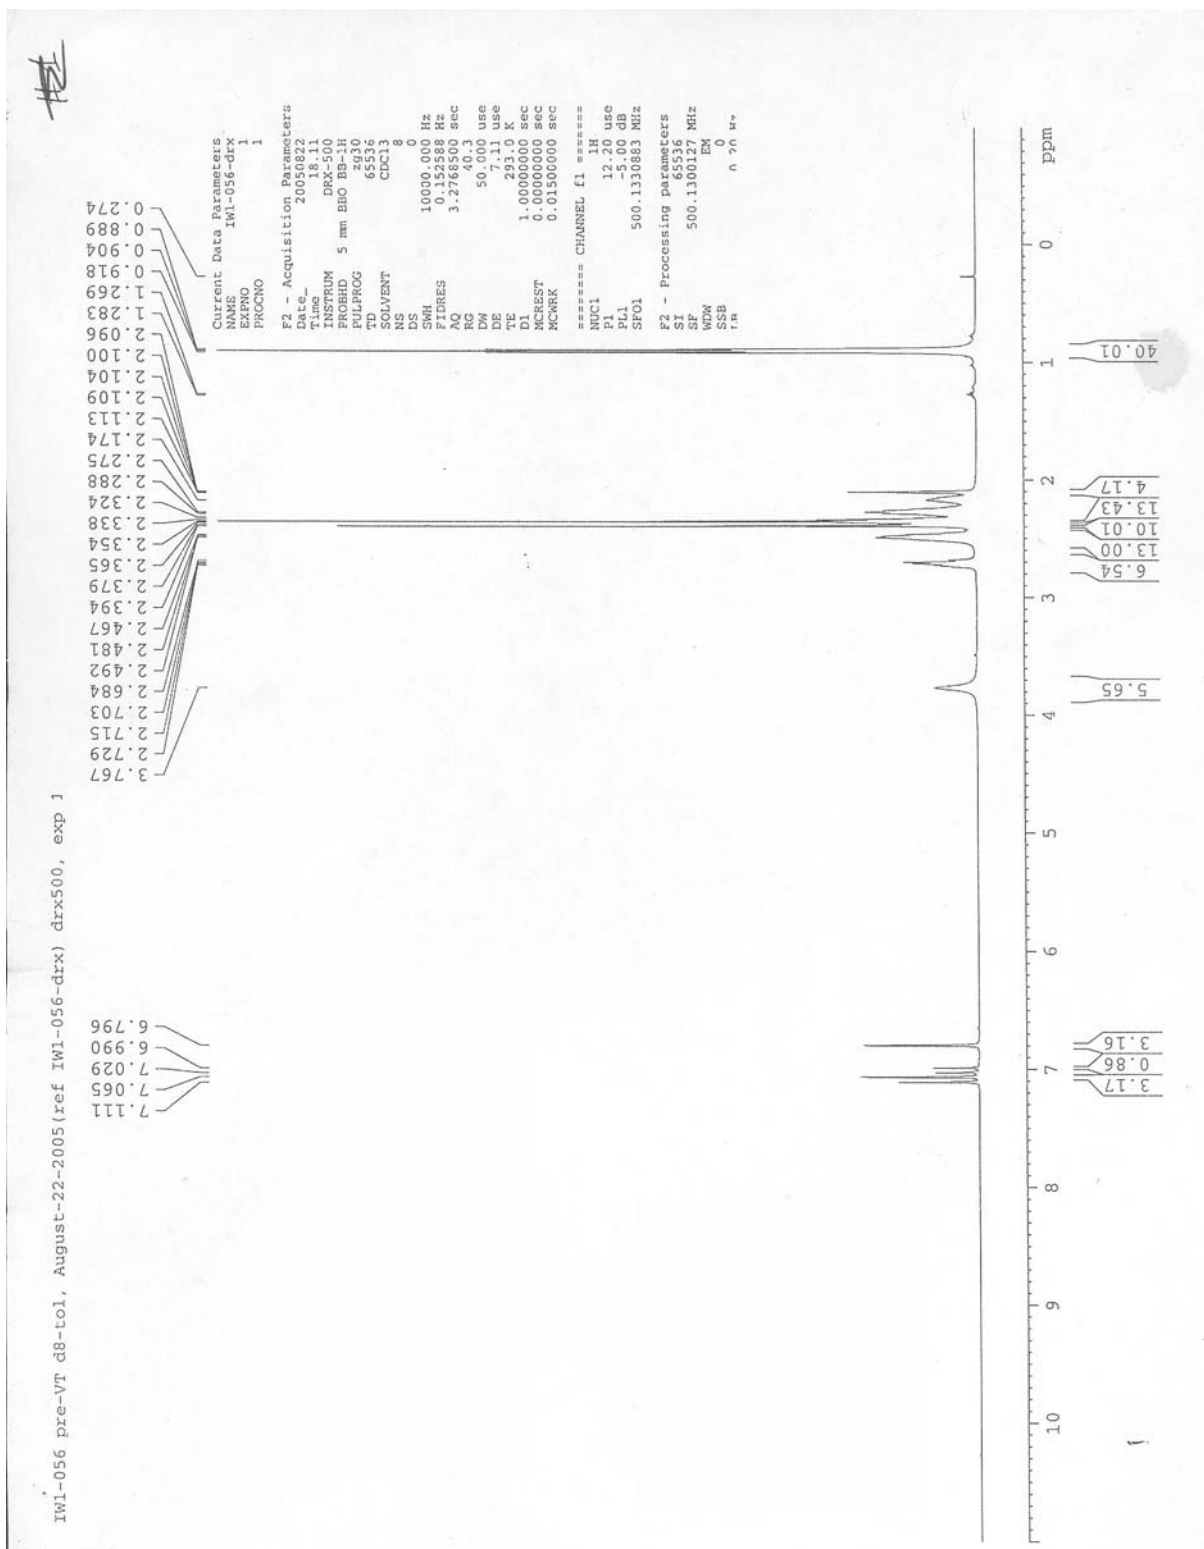

Figure 11.  $^1\text{H}$  NMR spectra of  $\text{LiL}^1$  (500 MHz,  $d_8$ -toluene, 303 K).

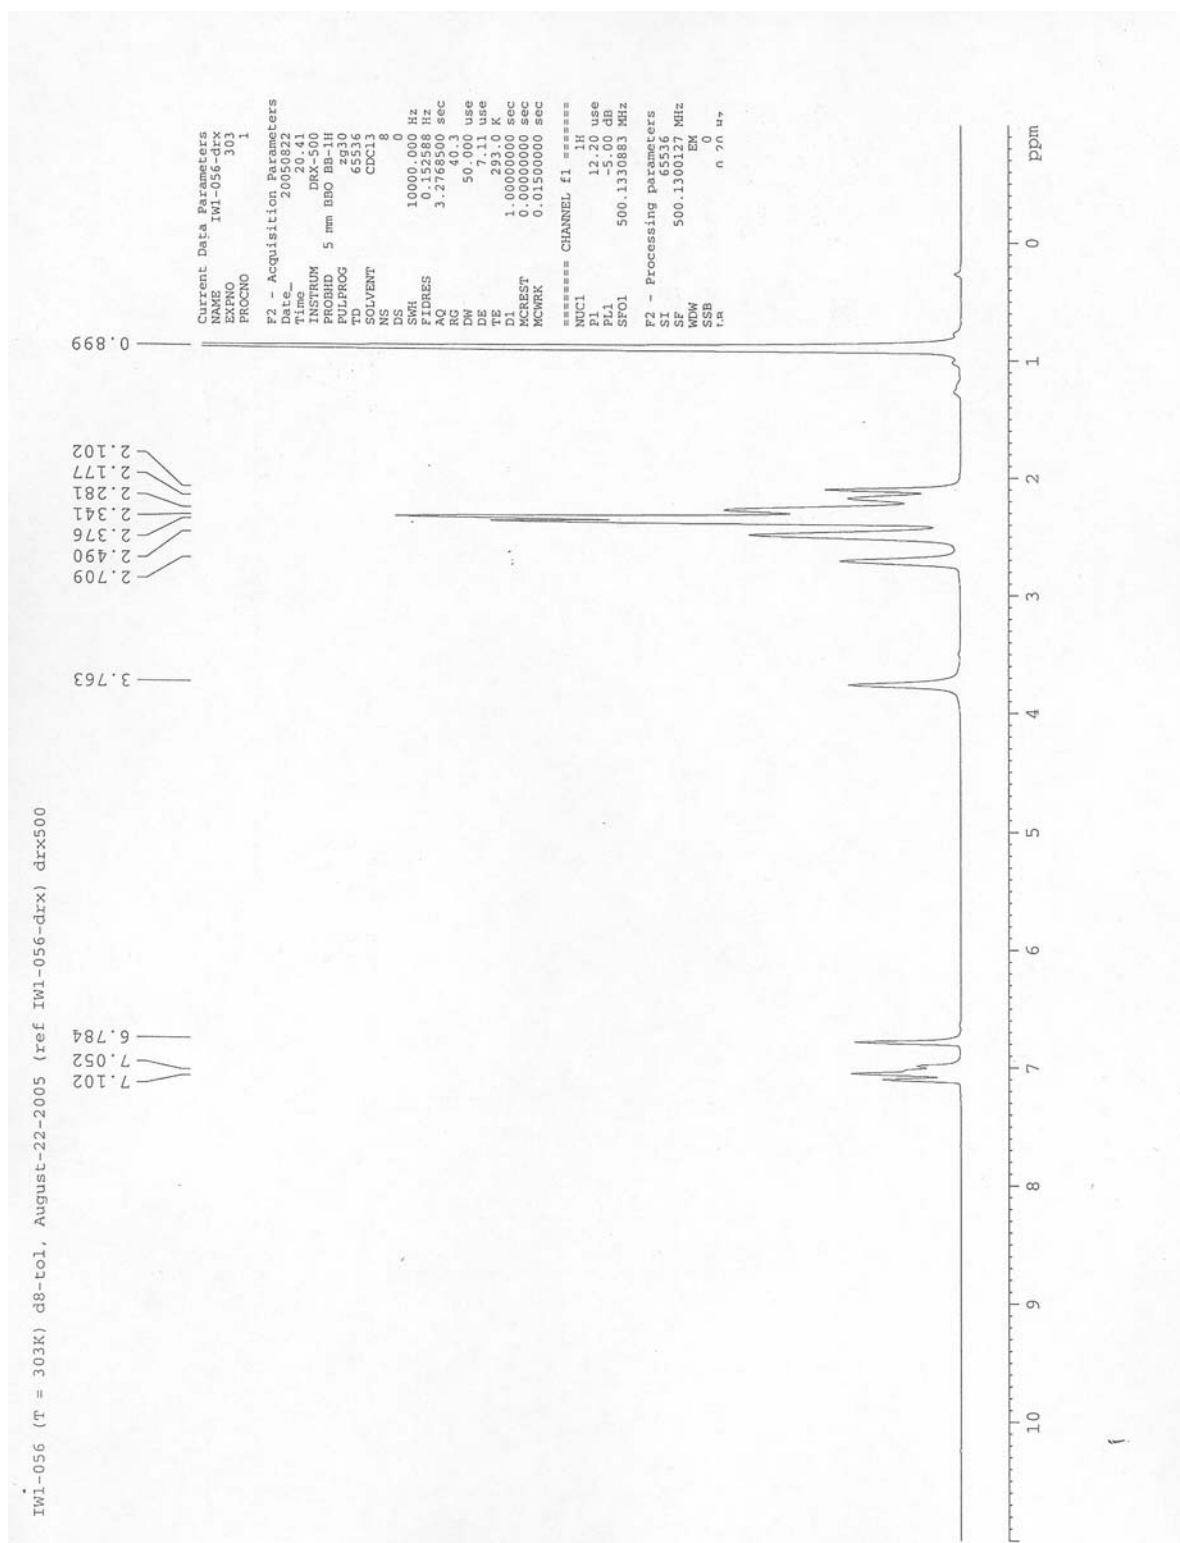

Figure 12.  $^1\text{H}$  NMR spectra of  $\text{LiL}^1$  (500 MHz,  $d_8$ -toluene, 323 K).

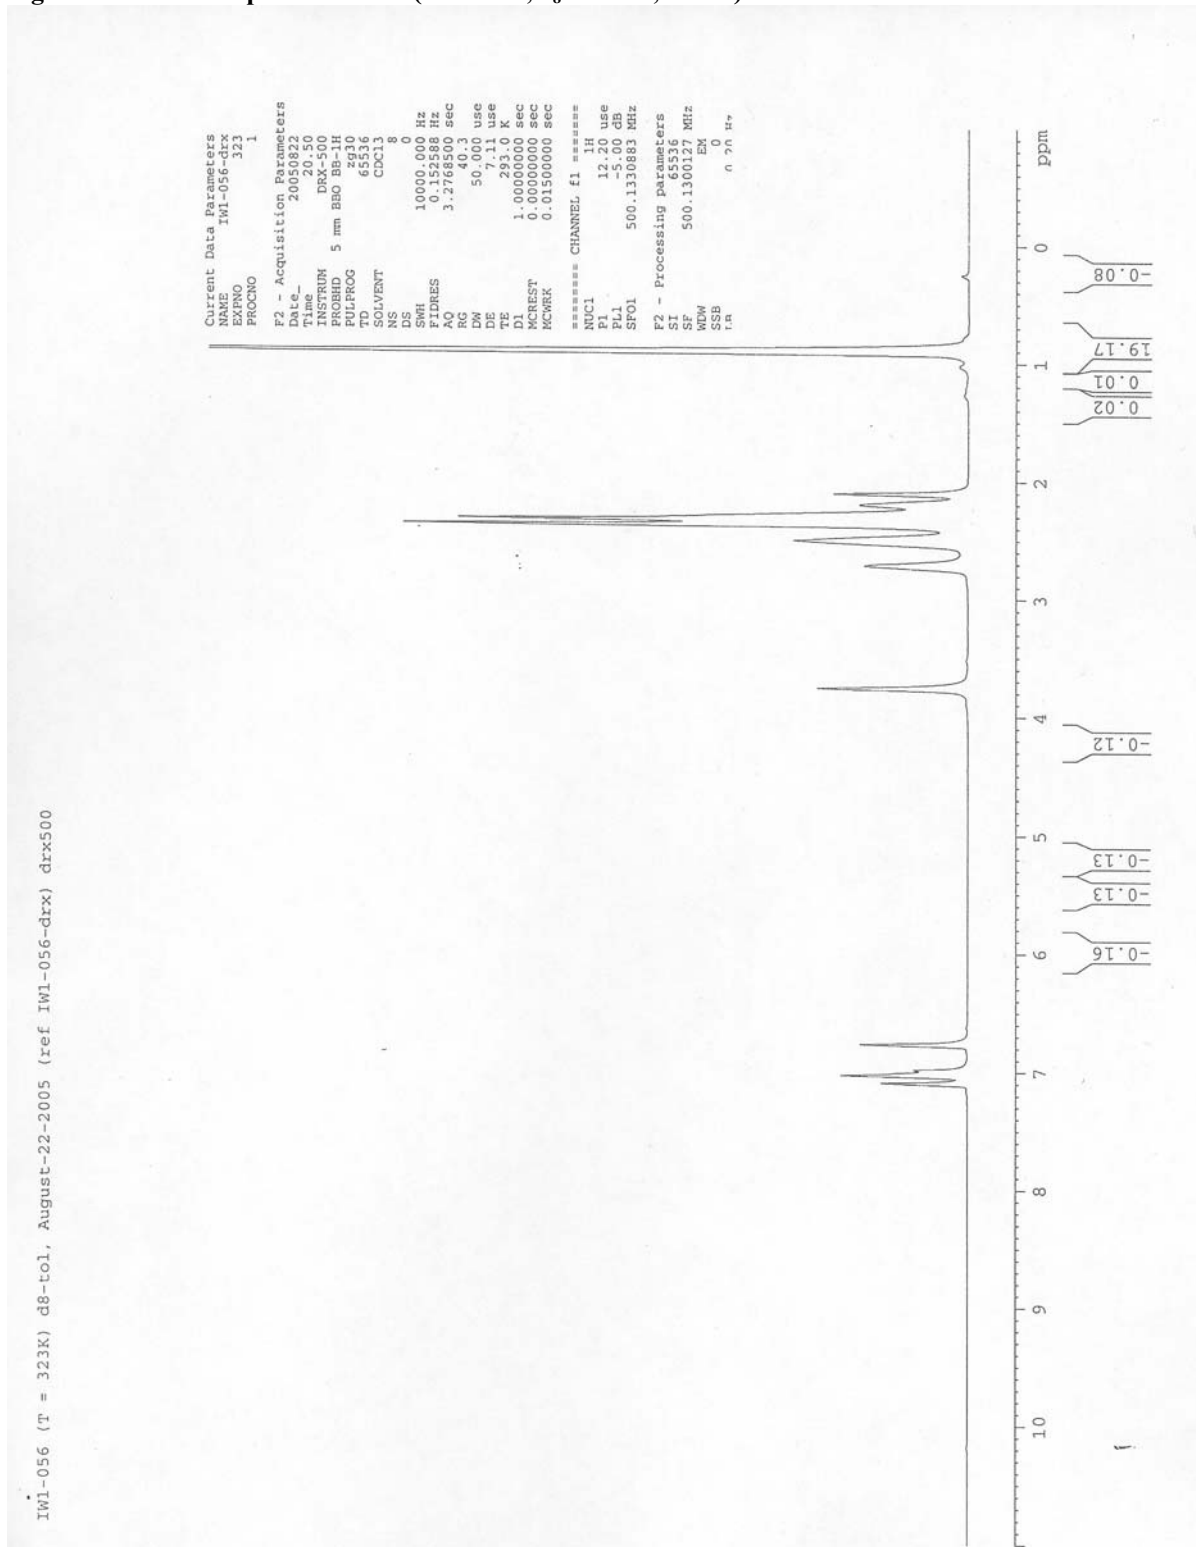



Figure 13.  $^1\text{H}$  NMR spectra of  $\text{LiL}^1$  (500 MHz,  $d_8$ -toluene, 343 K).

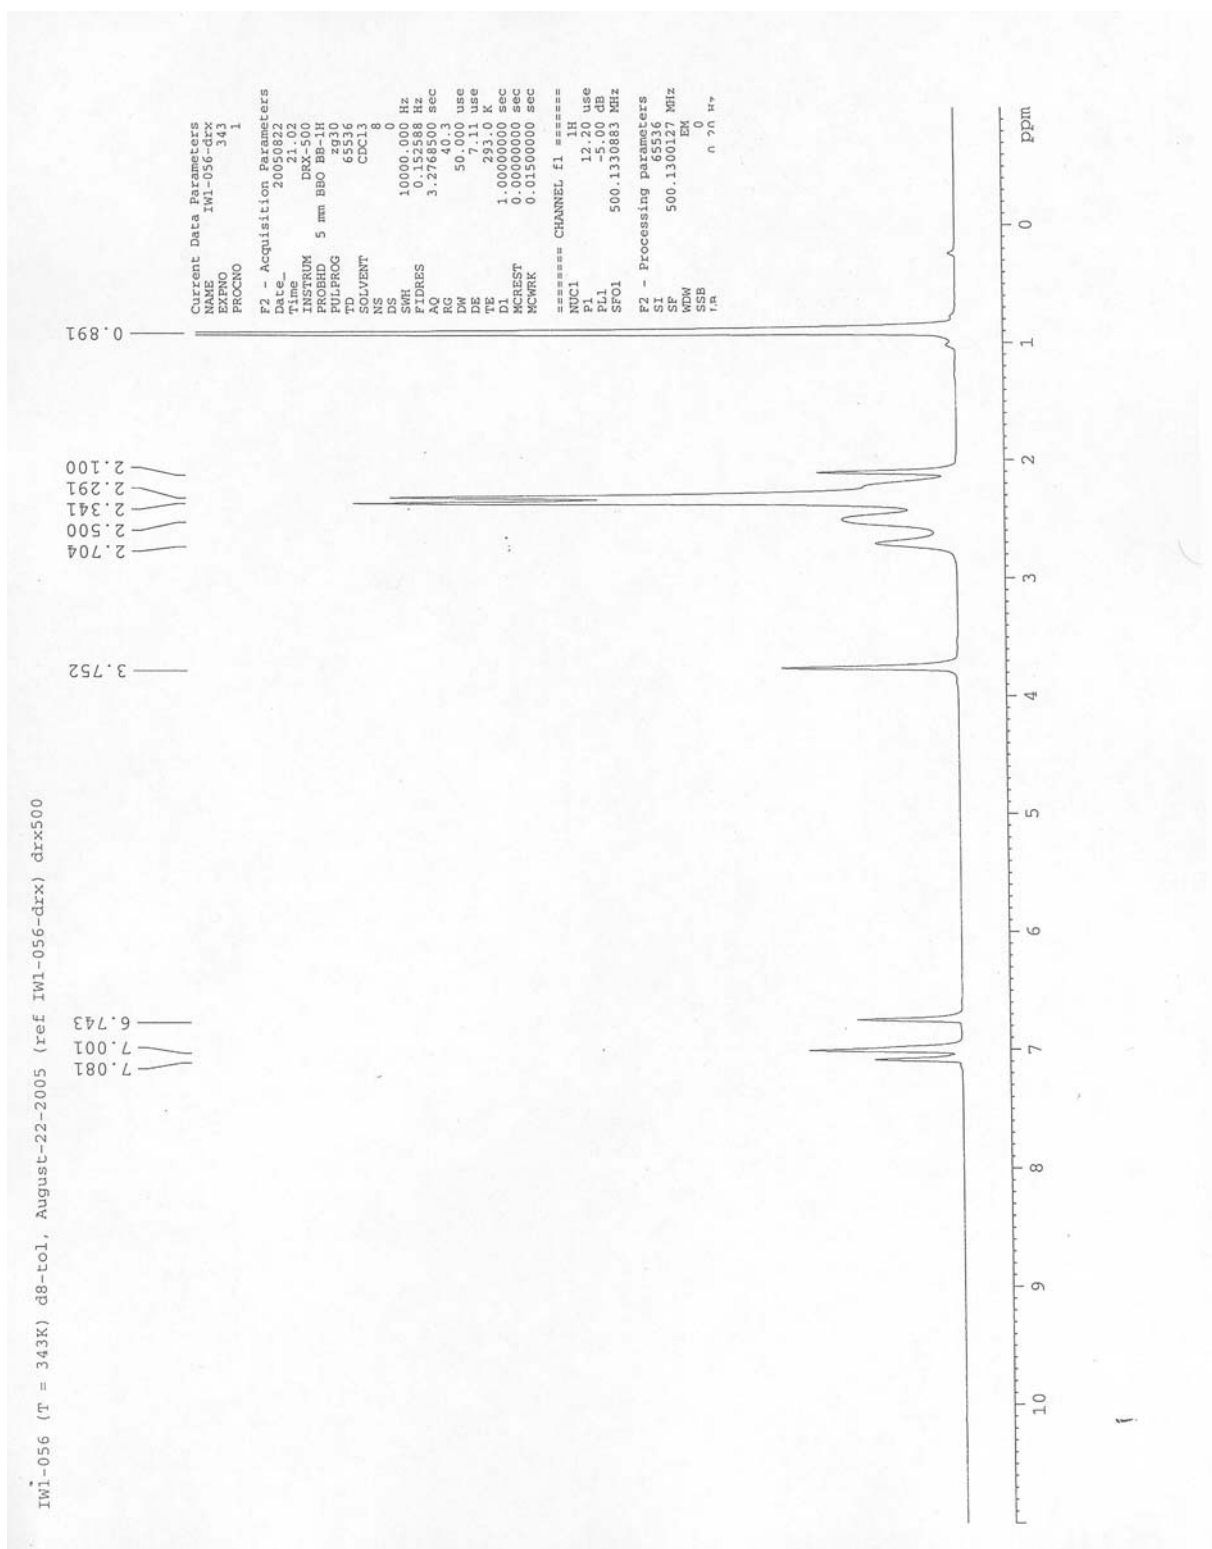

Figure 14.  $^1\text{H}$  NMR spectra of  $\text{LiL}^1$  (500 MHz,  $d_8$ -toluene, 363 K).

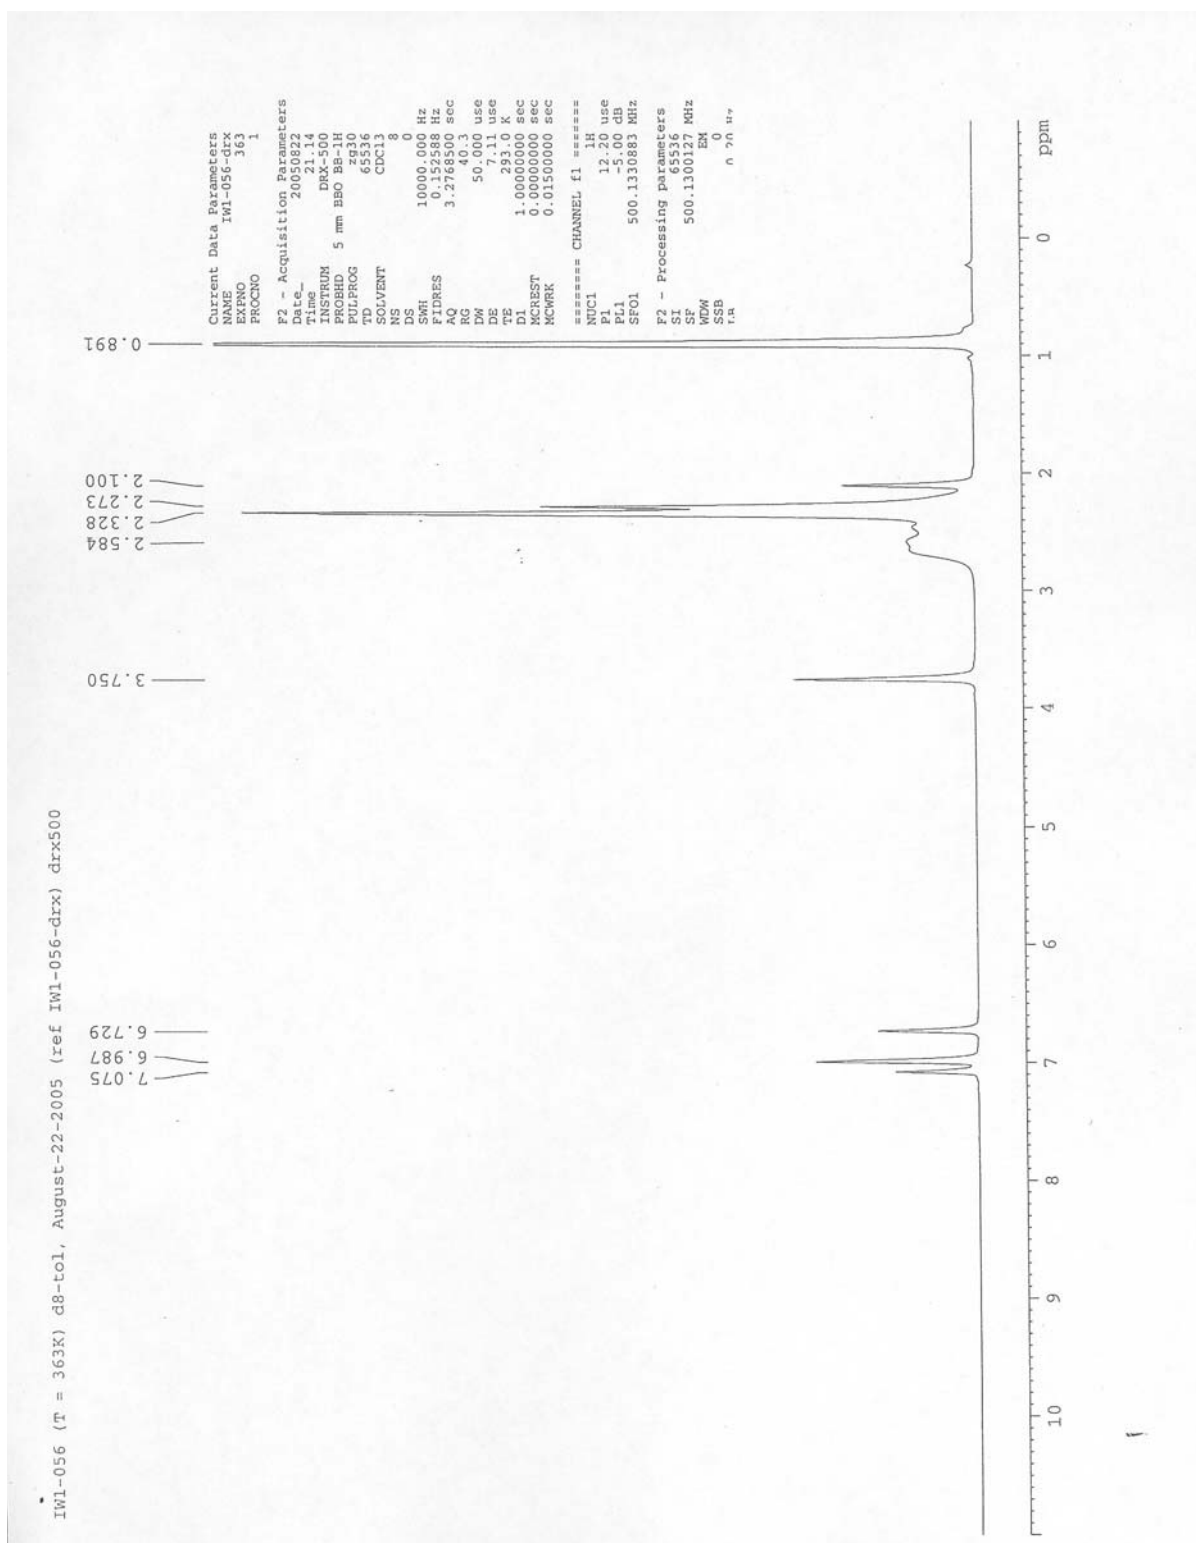

Supplement: b600939e.pdf [file b600939e.pdf]
